# Supplementary material for: Lycopalhine A, a novel sterically congested Lycopodium alkaloid with an unprecedented skeleton from Palhinhaea cernua
Source: Royal Society of Chemistry journal article supplement (doi:10.1039/c2cc34676a), 2012-01-01
Supplement: c2cc34676a.pdf [file c2cc34676a.pdf]

**Supporting Information for**  
**Lycopalhine A, a novel sterically congested *Lycopodium***  
**alkaloid with an unprecedented skeleton from *Palhinhaea***  
***cernua***

Liao-Bin Dong,<sup>a,c</sup> Jing Yang,<sup>b</sup> Juan He,<sup>a</sup> Huai-Rong Luo,<sup>a</sup> Xing-De Wu,<sup>a</sup>  
Xu Deng,<sup>a</sup> Li-Yan Peng,<sup>a</sup> Xiao Cheng,<sup>a</sup> and Qin-Shin Zhao<sup>\*,a</sup>

<sup>a</sup> *State Key Laboratory of Phytochemistry and Plant Resources in West China, Kunming Institute of Botany, Chinese Academy of Sciences, Kunming 650201, P. R. China.*

<sup>b</sup> *Shanghai Institute of Materia Medica, Chinese Academy of Sciences, Shanghai 201203, P. R. China.*

<sup>c</sup> *Graduate School of the Chinese Academy of Sciences, Beijing 100039, P. R. China.*

---

\* Corresponding author. Phone: (86) 871-5223058. Fax: (86) 871-5215783  
E-mail: qinshizhao@mail.kib.ac.cn

## Contents of Supporting Information

| No. | Contents                                                                                                                         |
|-----|----------------------------------------------------------------------------------------------------------------------------------|
| 1   | Detailed experimental procedures                                                                                                 |
| 2   | Figure S1. $^1\text{H}$ NMR spectrum (full spectrum) of lycopalhine A ( <b>1</b> ) in pyridine- $d_5$ (500 MHz)                  |
| 3   | Figure S2. $^1\text{H}$ NMR spectrum (0–4.5 ppm) of lycopalhine A ( <b>1</b> ) in pyridine- $d_5$                                |
| 4   | Figure S3. $^1\text{H}$ NMR spectrum (1.5–2.5 ppm) of lycopalhine A ( <b>1</b> ) in pyridine- $d_5$                              |
| 5   | Figure S4. $^{13}\text{C}$ and DEPT NMR spectra (full spectra) of lycopalhine A ( <b>1</b> ) in pyridine- $d_5$ (125 MHz)        |
| 6   | Figure S5. $^{13}\text{C}$ and DEPT NMR spectra (20–70 ppm) of lycopalhine A ( <b>1</b> ) in pyridine- $d_5$                     |
| 7   | Figure S6. HSQC spectrum ( $\delta_{\text{H}}$ 0–4.5 ppm and $\delta_{\text{C}}$ 15–90 ppm) of lycopalhine A ( <b>1</b> )        |
| 8   | Figure S7. $^1\text{H}$ – $^1\text{H}$ COSY spectrum (0.5–4.5 ppm) of lycopalhine A ( <b>1</b> )                                 |
| 9   | Figure S8. $^1\text{H}$ – $^1\text{H}$ COSY spectrum (1.4–2.5 ppm) of lycopalhine A ( <b>1</b> )                                 |
| 10  | Figure S9. HMBC spectrum ( $\delta_{\text{H}}$ 0.5–4.8 ppm and $\delta_{\text{C}}$ 15–225 ppm) of lycopalhine A ( <b>1</b> )     |
| 11  | Figure S10. HMBC spectrum ( $\delta_{\text{H}}$ 2.7–4.5 ppm and $\delta_{\text{C}}$ 15–95 ppm) of lycopalhine A ( <b>1</b> )     |
| 12  | Figure S11. HMBC spectrum ( $\delta_{\text{H}}$ 0.6–2.9 ppm and $\delta_{\text{C}}$ 15–95 ppm) of lycopalhine A ( <b>1</b> )     |
| 13  | Figure S12. ROESY spectrum (0.5–4.5 ppm) of lycopalhine A ( <b>1</b> )                                                           |
| 14  | Figure S13. Positive ESIMS spectrum of lycopalhine A ( <b>1</b> )                                                                |
| 15  | Figure S14. HRESIMS spectrum of lycopalhine A ( <b>1</b> )                                                                       |
| 16  | Figure S15. HRESIMS report of lycopalhine A ( <b>1</b> )                                                                         |
| 17  | Figure S16. CD and UV spectra of lycopalhine A ( <b>1</b> ) in methanol                                                          |
| 18  | Figure S17. IR spectrum of lycopalhine A ( <b>1</b> )                                                                            |
| 19  | Figure S18. Optimized geometries of lycopalhine A ( <b>1</b> ) at the B3LYP/6-31+g (d,p) level in the gas phase                  |
| 20  | Figure S19. Regression analysis of experimental vs. calculated $^{13}\text{C}$ NMR chemical shifts of lycopalhine A ( <b>1</b> ) |
| 21  | Table S1. Conformational analysis of lycopalhine A ( <b>1</b> )                                                                  |
| 22  | Table S2. Calculated, experimental chemical shifts, and the relative errors of lycopalhine A ( <b>1</b> )                        |
| 23  | Table S3. Optimized Z-Matrixes of lycopalhine A ( <b>1</b> ) at the level of B3LYP/6-31+G(d,p) in                                |

- 
- the gas phase (Å)
- 24 Table S4. Frequencies of lycopalhine A (**1**) at the B3LYP/6-31+G(d,p) level of theory in the gas phase ( $\text{cm}^{-1}$ )
- 25 Table S5. Frequencies of lycopalhine A (**1**) at the B3LYP-SCRF/6-31+G(d,p) level of theory in methanol (PCM model) ( $\text{cm}^{-1}$ )
- 26 Table S6. Frequencies of lycopalhine A (**1**) at the B3LYP-SCRF/6-31+G(d,p) level of theory in pyridine (PCM model) ( $\text{cm}^{-1}$ )
-

## Detailed experimental procedures

**General Experimental Procedures.** Optical rotation was measured at 15°C using a Jasco P-1020 polarimeter equipped with a 1 dm pathlength cell. IR spectrum was obtained over the frequency range of 399.3-3996.3  $\text{cm}^{-1}$  using a Tensor 27 spectrometer with KBr pellets. UV spectrum was recorded using a Shimadzu UV-2401A spectrophotometer equipped with a DAD and a 1 cm pathlength cell. Samples in methanol solution (0.032mg/ml) were scanned from 190-400 nm in 1 nm steps. ECD spectrum was recorded using an Applied Photophysics Chirascan spectrometer equipped with a 1 cm pathlength cell. Samples in methanol solution (0.32mg/ml) were scanned from 195-400 nm in 1 nm steps. 1D and 2D NMR spectra were performed on a Bruker DRX-500 spectrometer with TMS as an internal standard. Mass spectra were obtained on a Bruker Esquire HCT 3D ion trap mass spectrometer (ESI mode) and an API-Qstar-Pulsar instrument (HRESI mode). Column chromatography (CC) was performed using silica gel (200–300 mesh, Qingdao Marine Chemical Co. Ltd., Qingdao, People's Republic of China) and MCI gel (75–150  $\mu\text{m}$ ; Mitsubishi Chemical Corporation, Japan).

**Computational Methods.** The theoretical  $^{13}\text{C}$  NMR and ECD spectra were performed by density functional theory (DFT) and time-dependent DFT (TD-DFT), respectively, using Gaussian 09<sup>1</sup> and analyzed using GUIs *GaussView* (version 5.0). A conformational search using molecular mechanics calculations was performed in Discovery Studio 3.1 Client.<sup>2</sup> The corresponding minimum geometries were fully optimized by DFT at the B3LYP/6-31G(d) level, followed then optimized at the

B3LYP/6-31+G(d, p) level of theory in three systems (the gas phase, methanol, and pyridine). Frequency calculations (at 298.15 K) at the same level of theory were used to confirm the nature of all stationary points as minima and also provided values for computed free energies.<sup>3</sup> Boltzmann statistics based on relative free energies at 298.15 K was used in the computations.<sup>4</sup> The relative energies, relative free energies in three systems (the gas phase, methanol, and pyridine), together with their Boltzmann-calculated distributions are given in Table S1.

The <sup>13</sup>C NMR shielding constants were computed using GIAO technique at the mPW1PW91-SCRF/6-311+G(2d,p) level of theory in PCM solvent continuum model with pyridine as a solvent.<sup>5</sup> The <sup>13</sup>C NMR chemical shifts were calculated as  $\delta = \sigma_{\text{ref.}} - \sigma$ , where  $\sigma_{\text{ref.}}$  was the shielding constant of TMS calculated at the same level of theory (187.1160 ppm).<sup>6</sup> Calibration of the <sup>13</sup>C NMR chemical shifts was effected by plotting experimental values against calculated values and performing linear regression analysis. The resulting equation was then used for calibrating the calculated <sup>13</sup>C NMR chemical shifts (see Figure S19).<sup>6</sup>

Time-dependent DFT (TD-DFT) with the basis set B3LYP/6-31+G(d,p) was used to calculate the excitation energies ( $E$ ), oscillator strength ( $f$ ), rotatory strength in velocity form ( $R_{\text{vel}}$ ) and rotatory strength in length form ( $R_{\text{len}}$ ) of the lowest 30 excited states.<sup>7</sup> The calculations were performed in the gas phase and in methanol using the COSMO solvent continuum model. The peak intensity,  $\Delta\varepsilon(E)$ , was calculated with the Gaussian function:

$$\Delta\varepsilon(E) = \frac{1}{2.297 \times 10^{-39}} \frac{1}{\sqrt{2\pi}\sigma} \sum_i^A \Delta E_i R_i e^{-[(E - \Delta E_i)/(2\sigma)]^2}$$

where  $\sigma$  is the width of the band at  $1/e$  height and  $\Delta E_i$  and  $R_i$  are the excitation energies and rotatory strengths for transition  $i$ , respectively,  $\sigma = 0.20$  eV and  $R_{\text{vel}}$  were used.<sup>7</sup>

**Extraction and Isolation.** The whole plant of *P. cernua* was collected in Guizhou Province, People's Republic of China, and was identified by one of the authors (X. C) (voucher no. 201105P). The air-dried and powdered sample (60 kg) was extracted with pure MeOH for three times (4, 3, and 3 h). The extracts were partitioned between EtOAc and 1% HCl/H<sub>2</sub>O. The water-soluble portion was adjusted to pH 9 with saturated aqueous Na<sub>2</sub>CO<sub>3</sub> solution, and then was extracted with CHCl<sub>3</sub> to afford an alkaloidal extract (51.5 g). The latter was chromatographed on MPLC (MCI gel) eluting with a gradient of MeOH–H<sub>2</sub>O (3:7, 6:4, 8:2, and 1:0) to give four fractions (F01–F04). F01 (6 g) and F02 (12 g) were submitted to repeated silica gel CC to yield lycopalhine A (**1**, 1.5 mg), and a known compound obscurinine (**2**, 10 mg)<sup>8</sup>, respectively.

**Lycopalhine A (1):** colorless gum;  $[\alpha]_D^{25} + 89.1$  (c 0.17, CH<sub>3</sub>OH); UV (CH<sub>3</sub>OH)  $\lambda_{\text{max}}$  (log  $\epsilon$ ) 203 (2.61) nm; IR (KBr)  $\nu_{\text{max}}$  3431, 2921, 1716, 1631, 1417, 1261, 1097, 1026, 802, 581 cm<sup>-1</sup>; <sup>1</sup>H and <sup>13</sup>C NMR data, see Table 1; positive ESIMS  $m/z$  289 [M + H]<sup>+</sup>; positive HRESIMS  $m/z$  2891920 [M + H]<sup>+</sup> (calcd for C<sub>17</sub>H<sub>25</sub>N<sub>2</sub>O<sub>2</sub>, 289.1916).

#### **Acetylcholinesterase (AChE)/Butrylcholinesterase(BuChE) Inhibitory Activity**

**Assay.** AChE/BuChE inhibitory activity of the compounds isolated was assayed by the spectrophotometric method developed by Ellman et.al with slightly modification.<sup>9</sup>

*S*-acetylthiocholine iodide, *S*-butyrylthiocholine iodide, 5,5'-dithio-bis-(2-nitrobenzoic) acid (DTNB, Ellman's reagent), AChE and BuChE derived from human erythrocytes were purchased from Sigma Chemical Company. Compounds were dissolved in DMSO. The reaction mixture contained 110  $\mu$ L of phosphate buffer (pH 8.0), 10  $\mu$ L of test compound (50  $\mu$ M), and 40  $\mu$ L of AChE or BuChE (0.04 U/100  $\mu$ L), and the mixture was incubated for 20 min (30 °C). The reaction was initiated by the addition of 20  $\mu$ L of DTNB (6.25 mM) and 20  $\mu$ L of acetylthiocholine or butyrylthiocholine for AChE or BuChE inhibitory activity, respectively. The hydrolysis of acetylthiocholine or butyrylthiocholine was monitored at 405 nm after 30 min. Tacrine was used as positive control. All the reactions were performed in triplicate. The percentage inhibition was calculated as follows: % inhibition =  $(E - S)/E \times 100$  (E is the activity of the enzyme without test compound and S is the activity of enzyme with test compound).

## Notes and references

- 1 Gaussian 09 package citation: Gaussian 09, Revision B.01, M. J. Frisch, G. W. Trucks, H. B. Schlegel, G. E. Scuseria, M. A. Robb, J. R. Cheeseman, G. Scalmani, V. Barone, B. Mennucci, G. A. Petersson, H. Nakatsuji, M. Caricato, X. Li, H. P. Hratchian, A. F. Izmaylov, J. Bloino, G. Zheng, J. L. Sonnenberg, M. Hada, M. Ehara, K. Toyota, R. Fukuda, J. Hasegawa, M. Ishida, T. Nakajima, Y. Honda, O. Kitao, H. Nakai, T. Vreven, J. A. Montgomery, Jr., J. E. Peralta, F. Ogliaro, M. Bearpark, J. J. Heyd, E. Brothers, K. N. Kudin, V. N. Staroverov, T. Keith, R. Kobayashi, J. Normand, K. Raghavachari, A. Rendell, J. C. Burant, S. S. Iyengar, J. Tomasi, M. Cossi, N. Rega, J. M. Millam, M. Klene, J. E. Knox, J. B. Cross, V. Bakken, C. Adamo, J. Jaramillo, R. Gomperts, R. E. Stratmann, O. Yazyev, A. J. Austin, R. Cammi, C. Pomelli, J. W. Ochterski, R. L. Martin, K. Morokuma, V. G. Zakrzewski, G. A. Voth, P. Salvador, J. J. Dannenberg, S. Dapprich, A. D. Daniels, O. Farkas, J. B. Foresman, J. V. Ortiz, J. Cioslowski, and D. J. Fox, Gaussian, Inc., Wallingford CT, 2010.
- 2 Reference 7 in the manuscript.
- 3 T. Oja, P. Tähtinen, N. Dreijack, P. Mäntsälä, J. Niemi, M. Metsä-Ketelä and K. D. Klika, *Tetrahedron: Asymmetry*, 2012, **23**, 670–682.
- 4 (a) M. W. Lodewyk and D. J. Tantillo, *J. Nat. Prod.*, 2011, **74**, 1339–1343. (b) P. Tähtinen, T. Oja, N. Dreijack, P. Mäntsälä, J. Niemi, M. Metsä-Ketelä and K. D. Klika, *RSC Adv.*, 2012, **2**, 5098–5100.



- 5 Reference 8 in the manuscript.
- 6 Reference 9 in the manuscript.
- 7 References 10 and 11 in the manuscript.
- 8 Reference 12 in the manuscript.
- 9 Reference 14 in the manuscript.

Figure S1.  $^1\text{H}$  NMR spectrum (full spectrum) of lycopalhine A (**1**) in pyridine- $d_5$  (500 MHz)

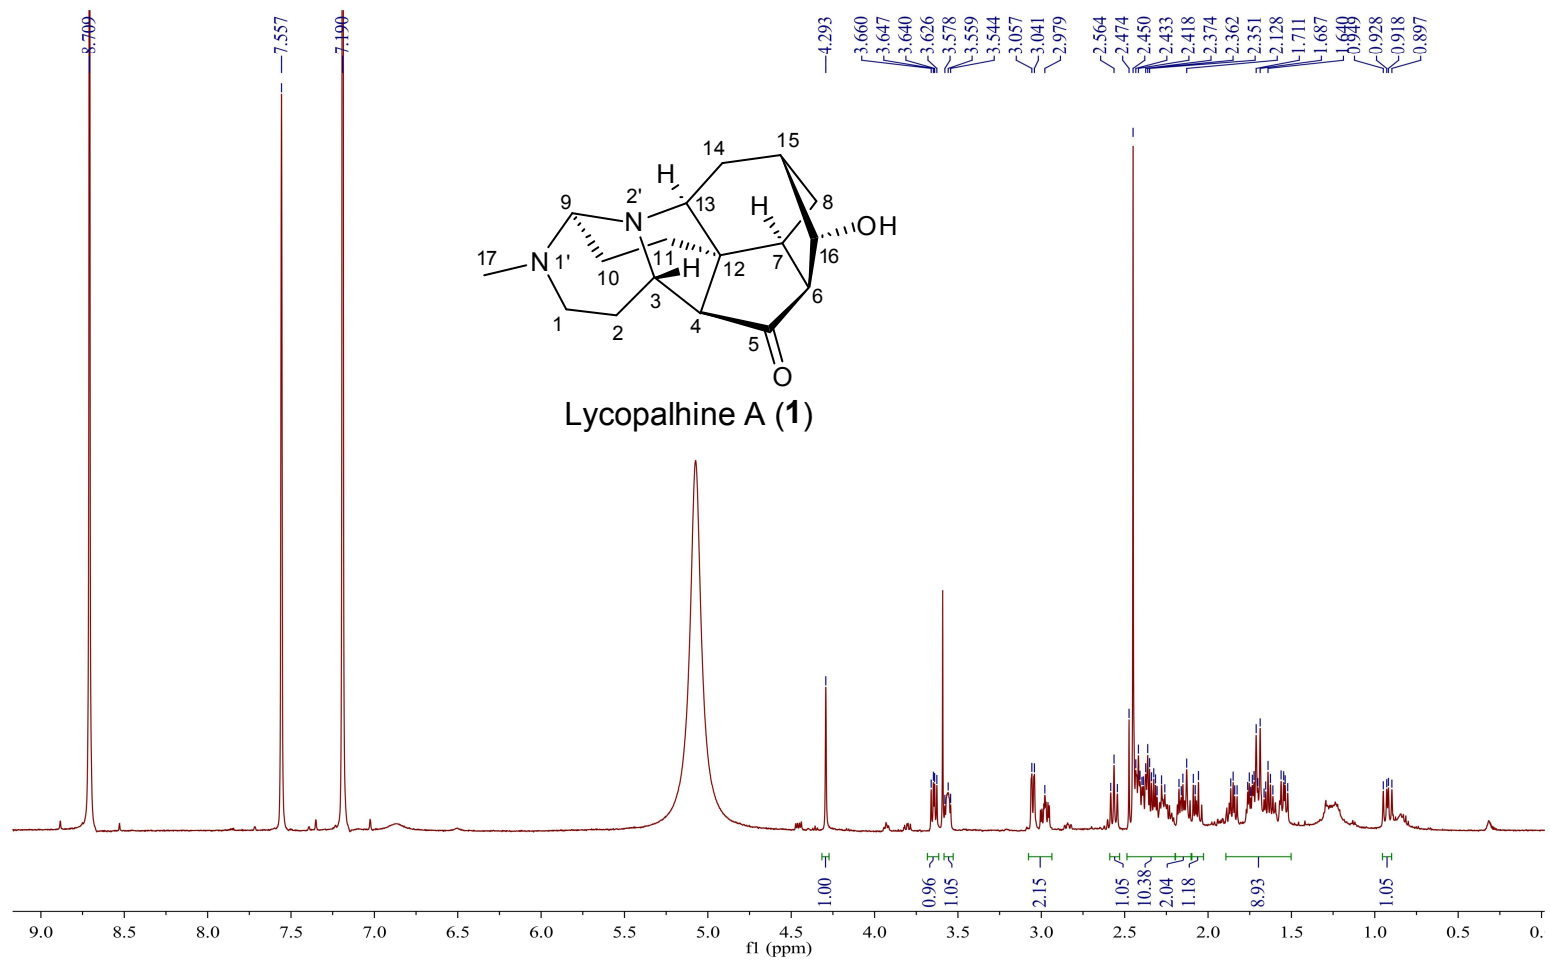

Figure S2.  $^1\text{H}$  NMR spectrum (0–4.5 ppm) of lycopalhine A (**1**) in pyridine- $d_5$  (500 MHz)

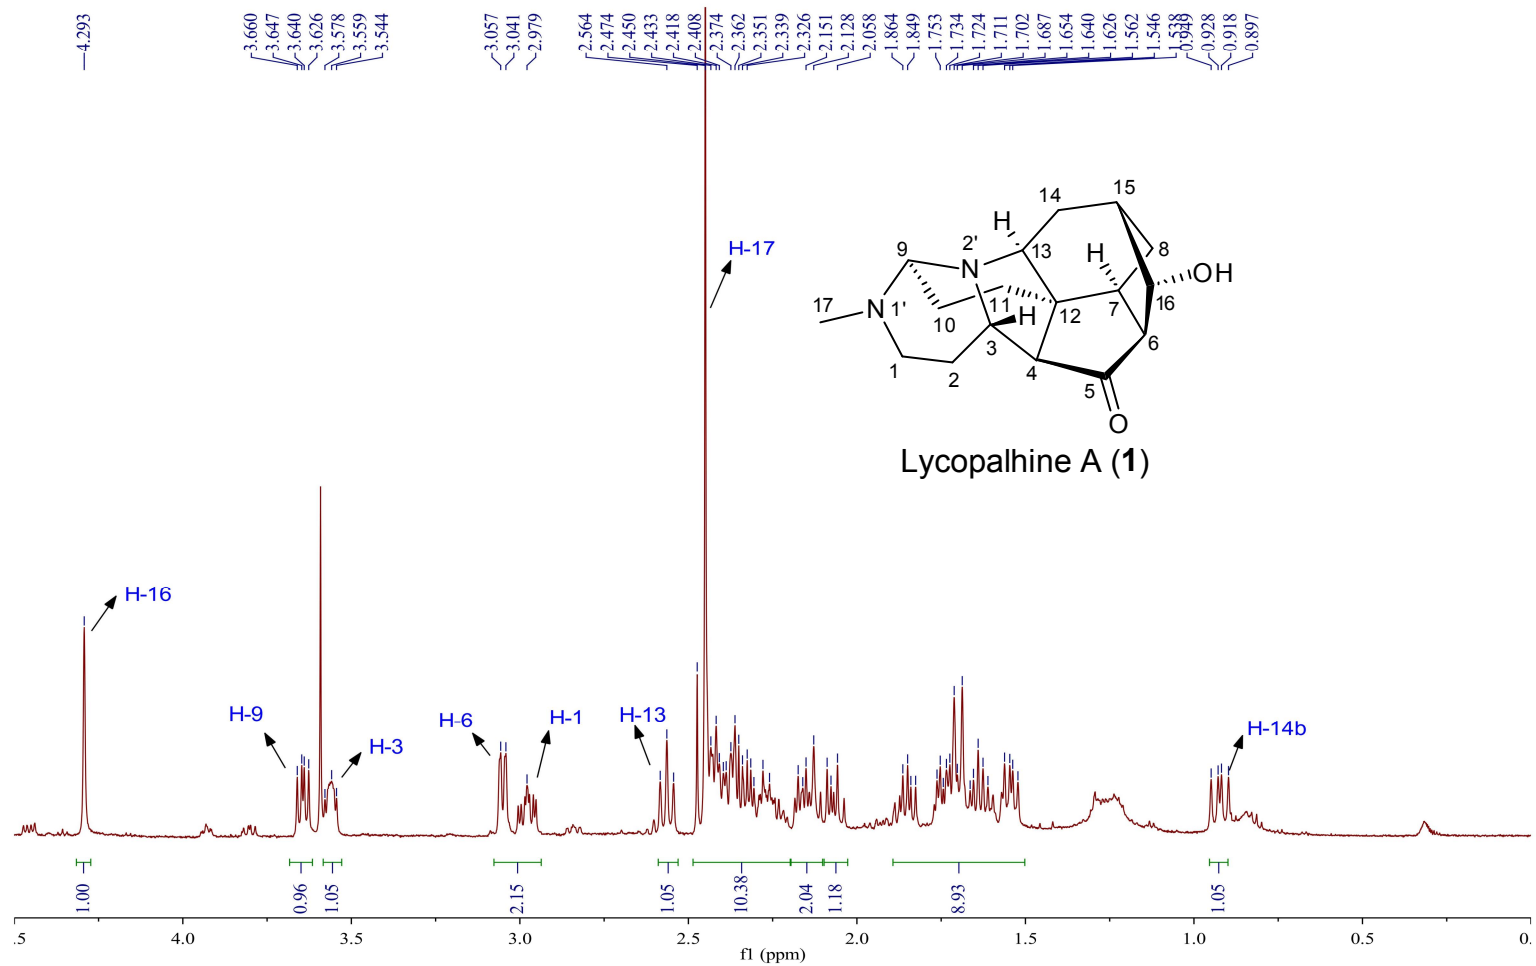

Figure S3.  $^1\text{H}$  NMR spectrum (1.5–2.5 ppm) of lycopalhine A (1) in pyridine- $d_5$  (500 MHz)

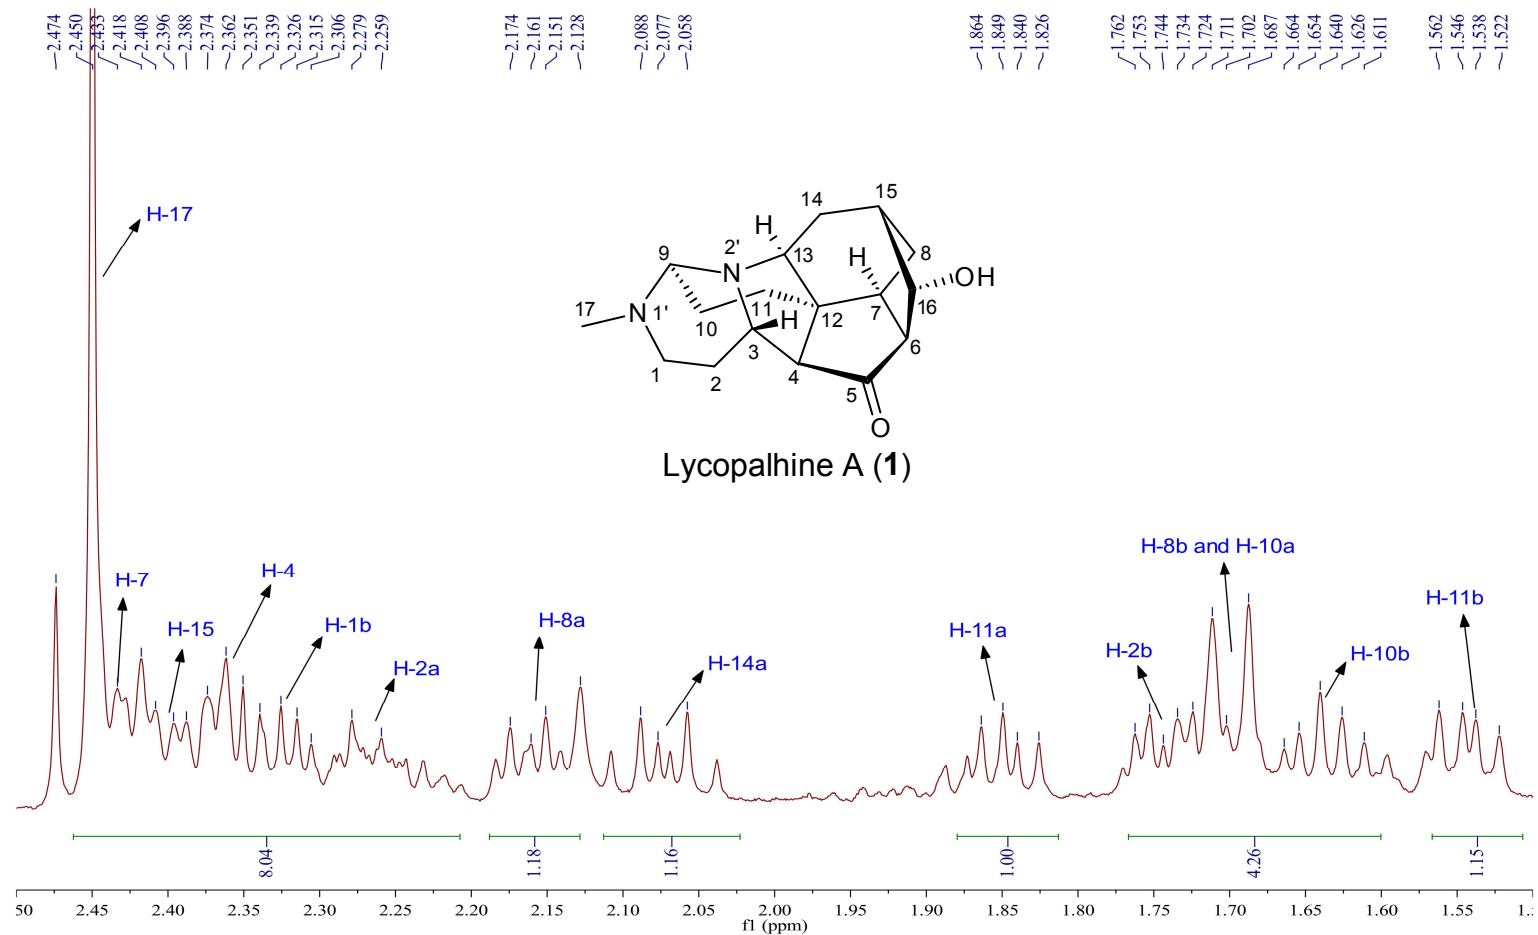

Figure S4.  $^{13}\text{C}$  and DEPT NMR spectra (full spectra) of lycopalhine A (**1**) in pyridine- $d_5$  (125 MHz)

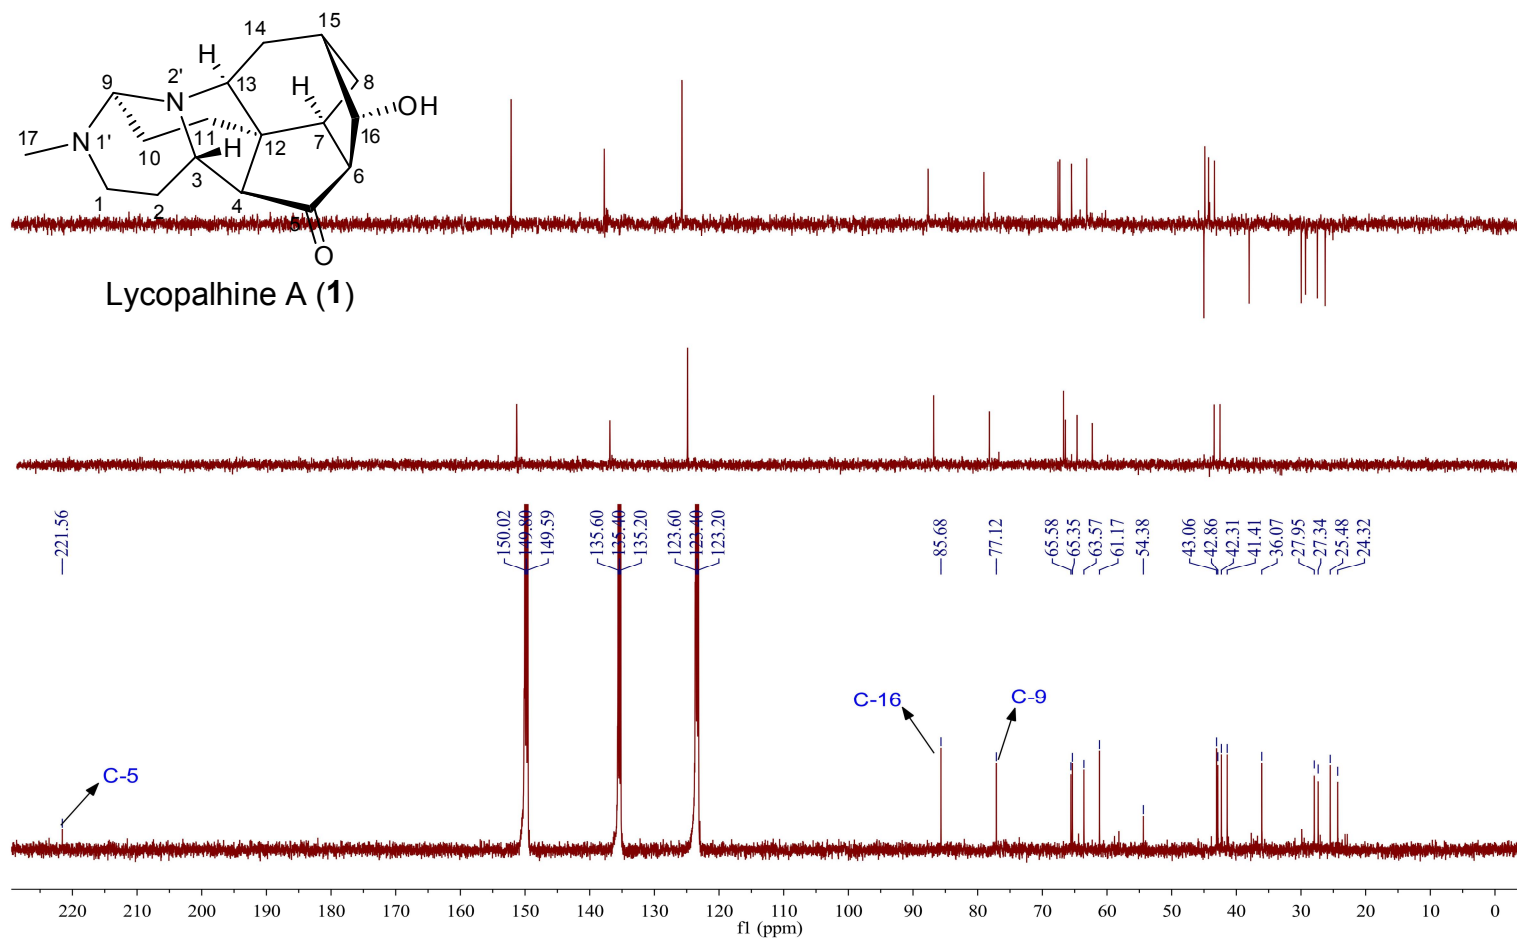

Figure S5.  $^{13}\text{C}$  and DEPT NMR spectra (20–70 ppm) of lycopalhine A (**1**) in pyridine- $d_5$  (125 MHz)

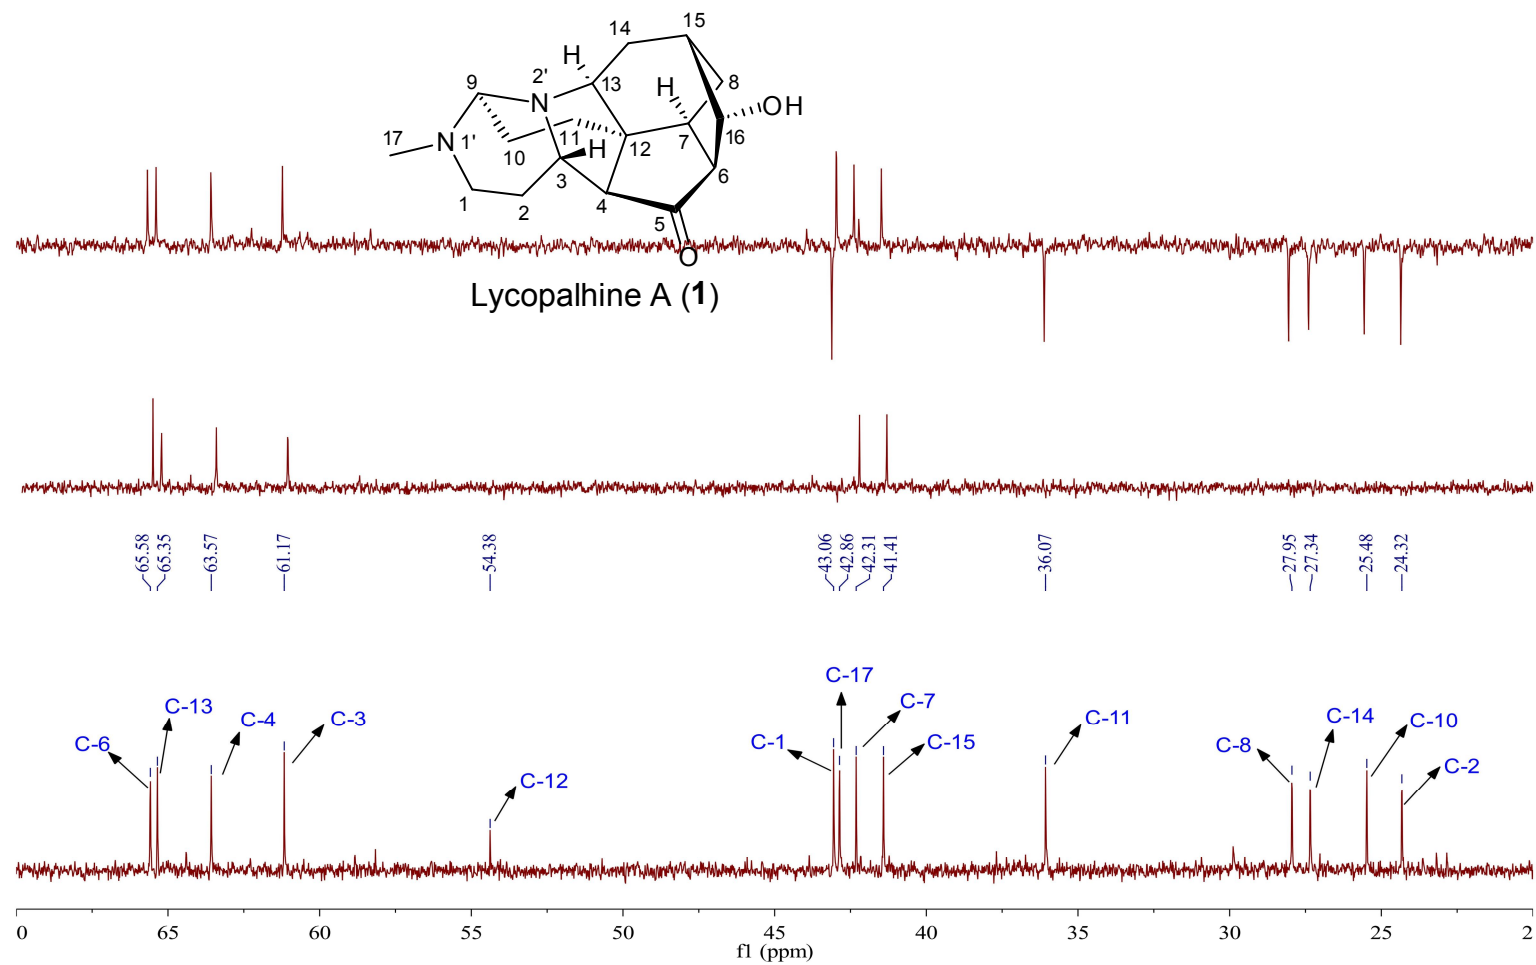

Figure S6. HSQC spectrum ( $\delta_{\text{H}}$  0–4.5 ppm and  $\delta_{\text{C}}$  15–90 ppm) of lycopalhine A (**1**) in pyridine- $d_5$

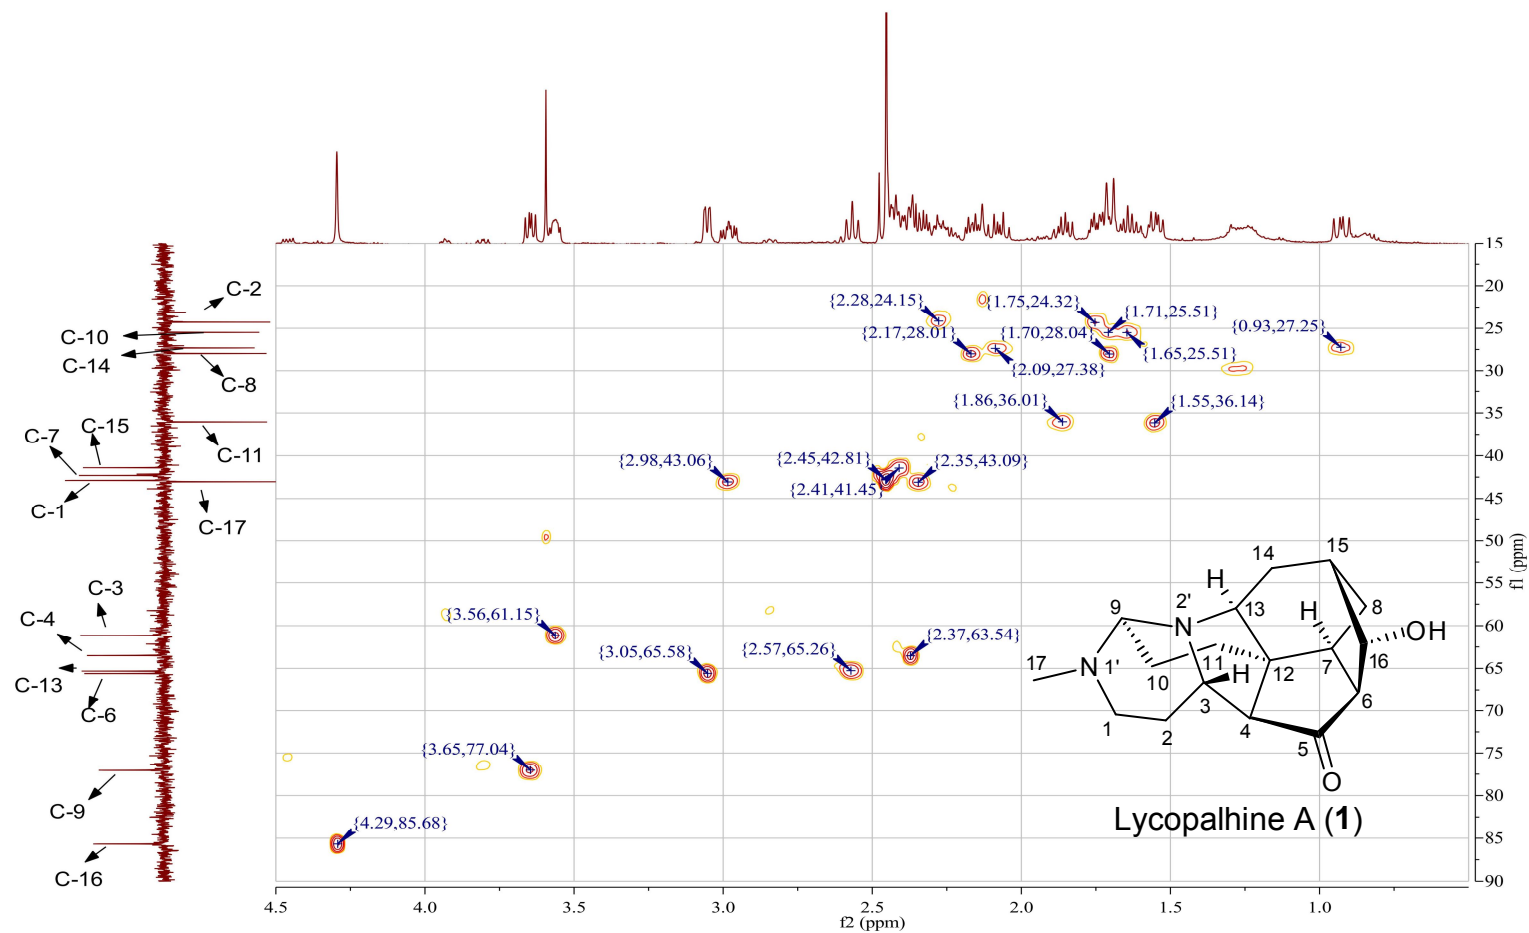

Figure S7.  $^1\text{H}$ - $^1\text{H}$  COSY spectrum (0.5–4.5 ppm) of lycopalhine A (**1**) in pyridine- $d_5$

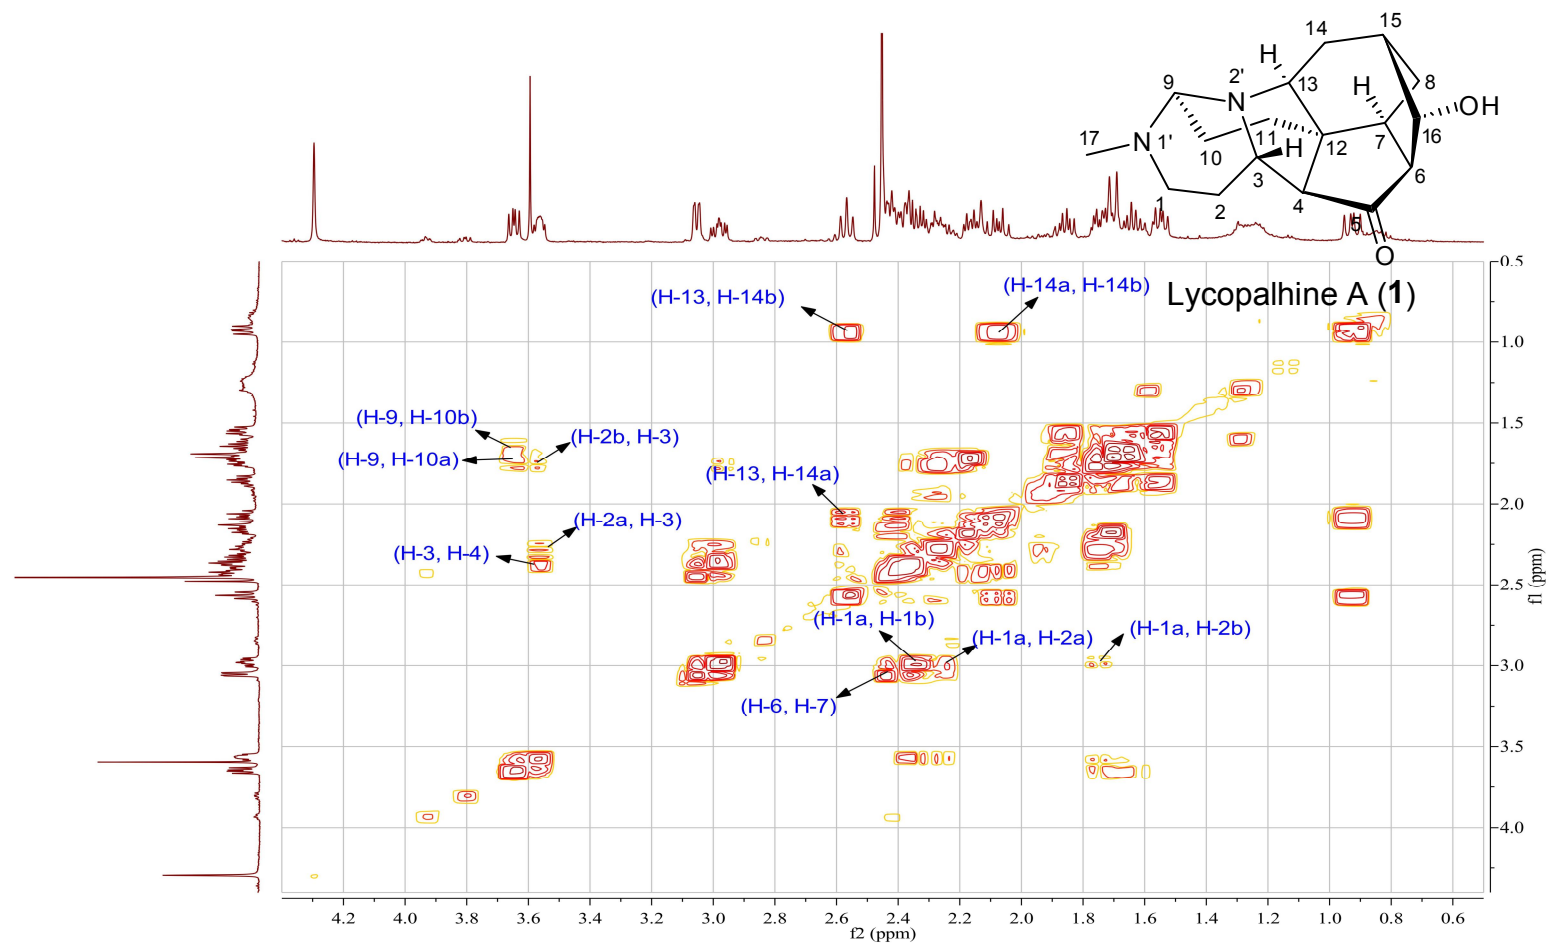



Figure S8.  $^1\text{H}$ - $^1\text{H}$  COSY spectrum (1.4–2.5 ppm) of lycopalhine A (**1**) in pyridine- $d_5$

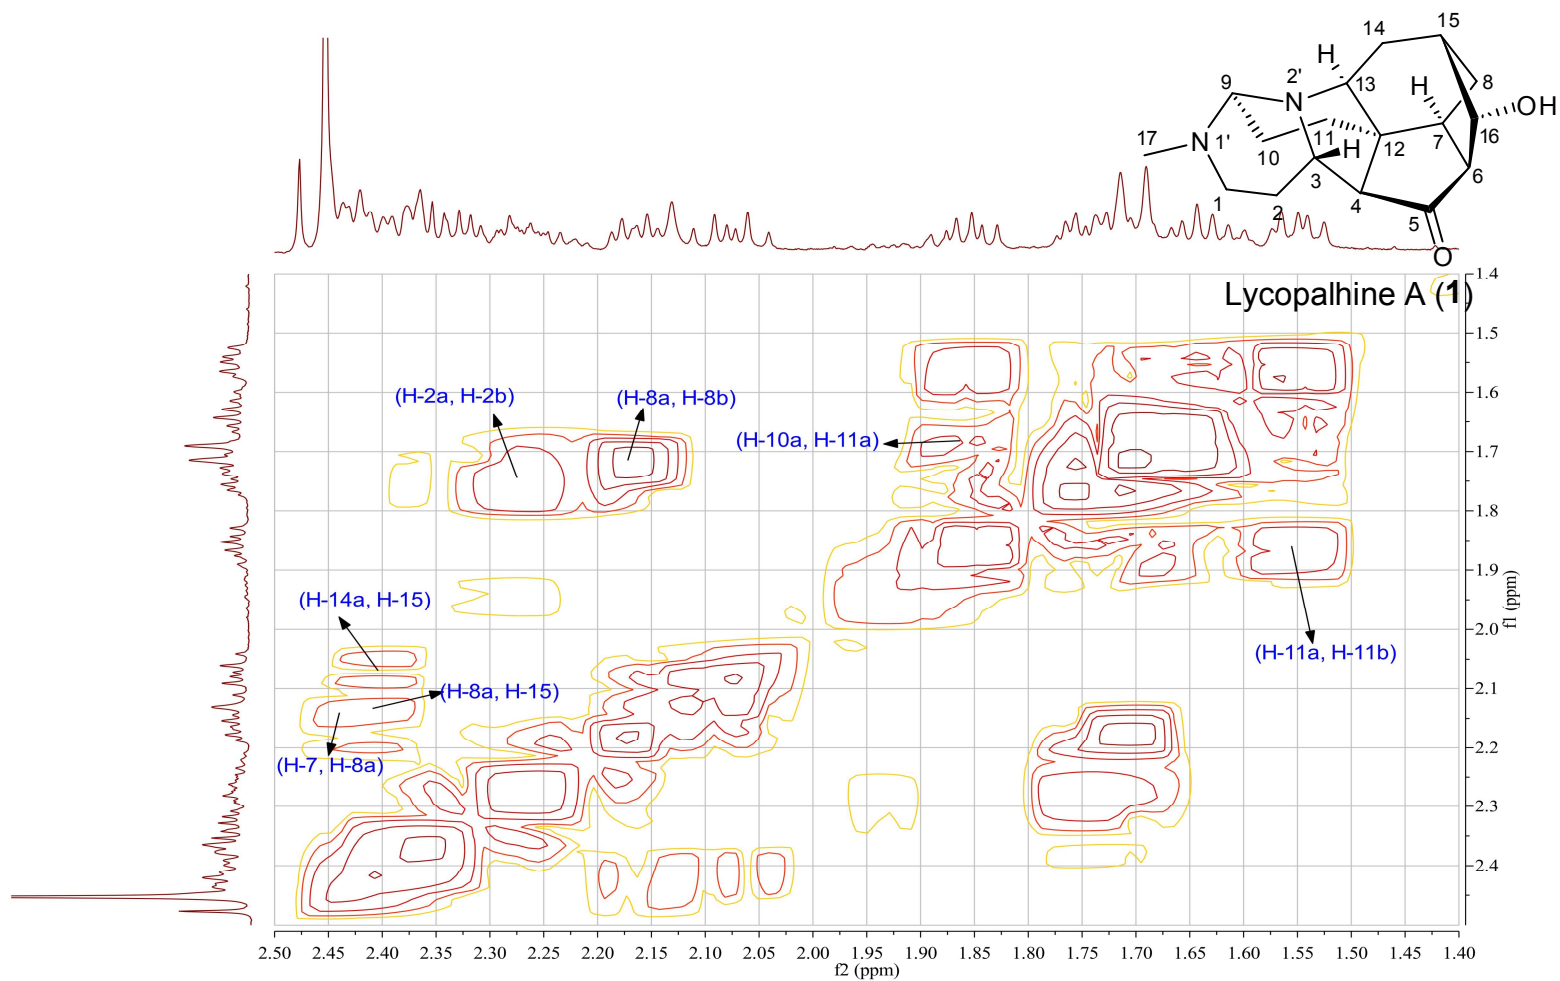

Figure S9. HMBC spectrum ( $\delta_{\text{H}}$  0.5–4.8 ppm and  $\delta_{\text{C}}$  15–225 ppm) of lycopalhine A (**1**) in pyridine- $d_5$

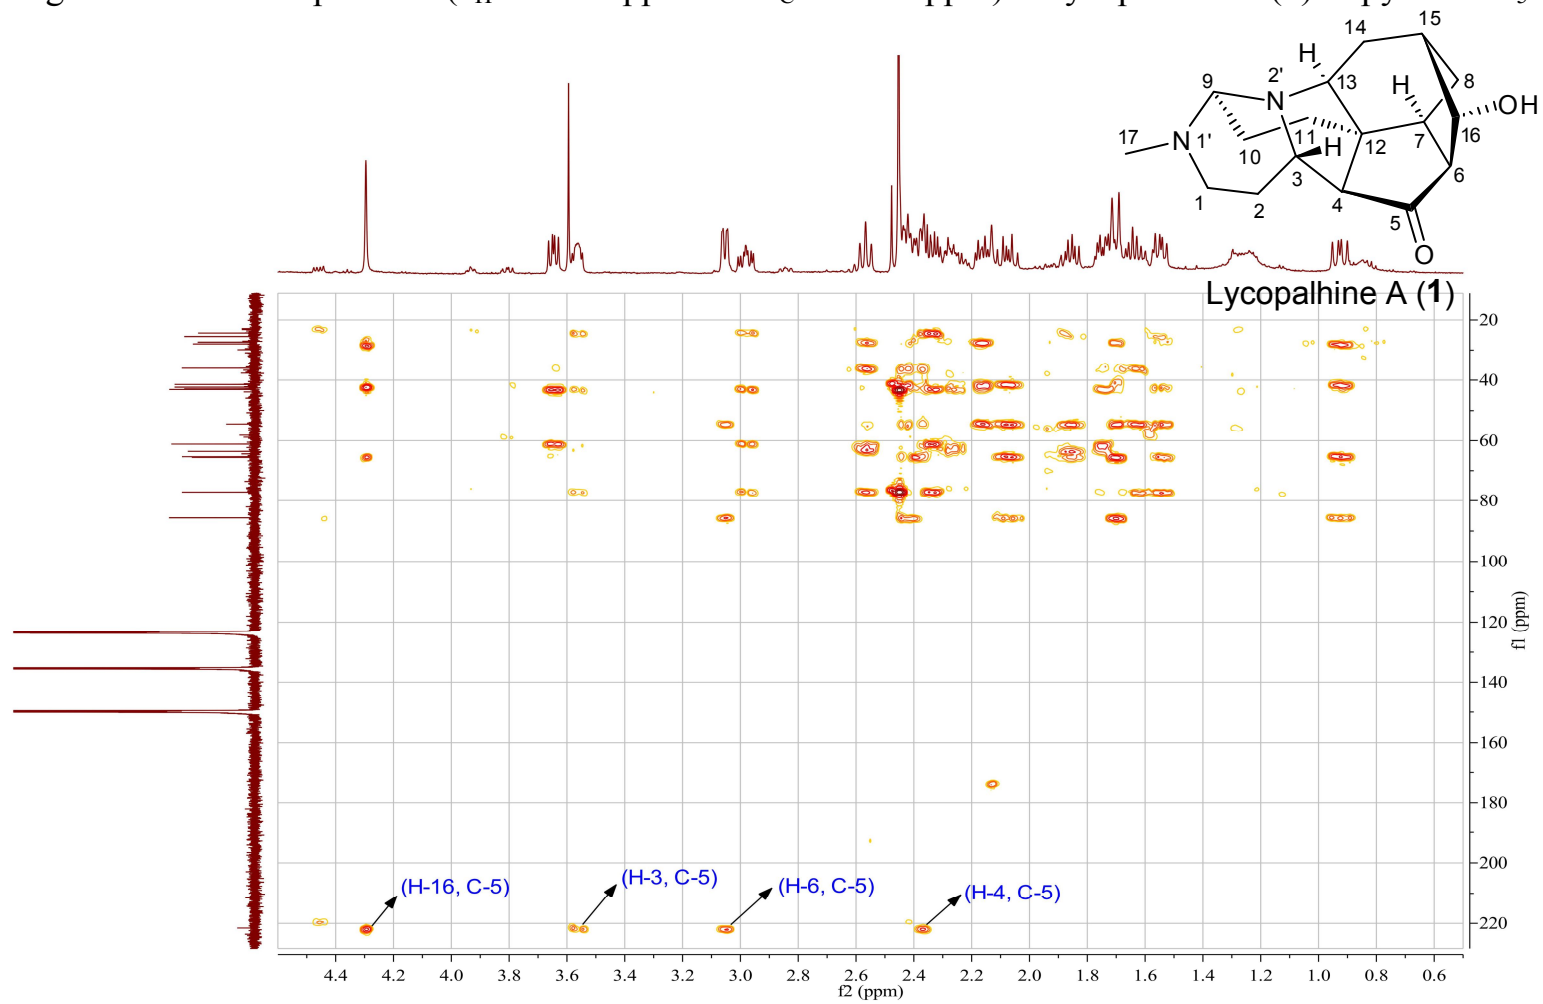

Figure S10. HMBC spectrum ( $\delta_{\text{H}}$  2.7–4.5 ppm and  $\delta_{\text{C}}$  15–95 ppm) of lycopalhine A (**1**) in pyridine- $d_5$

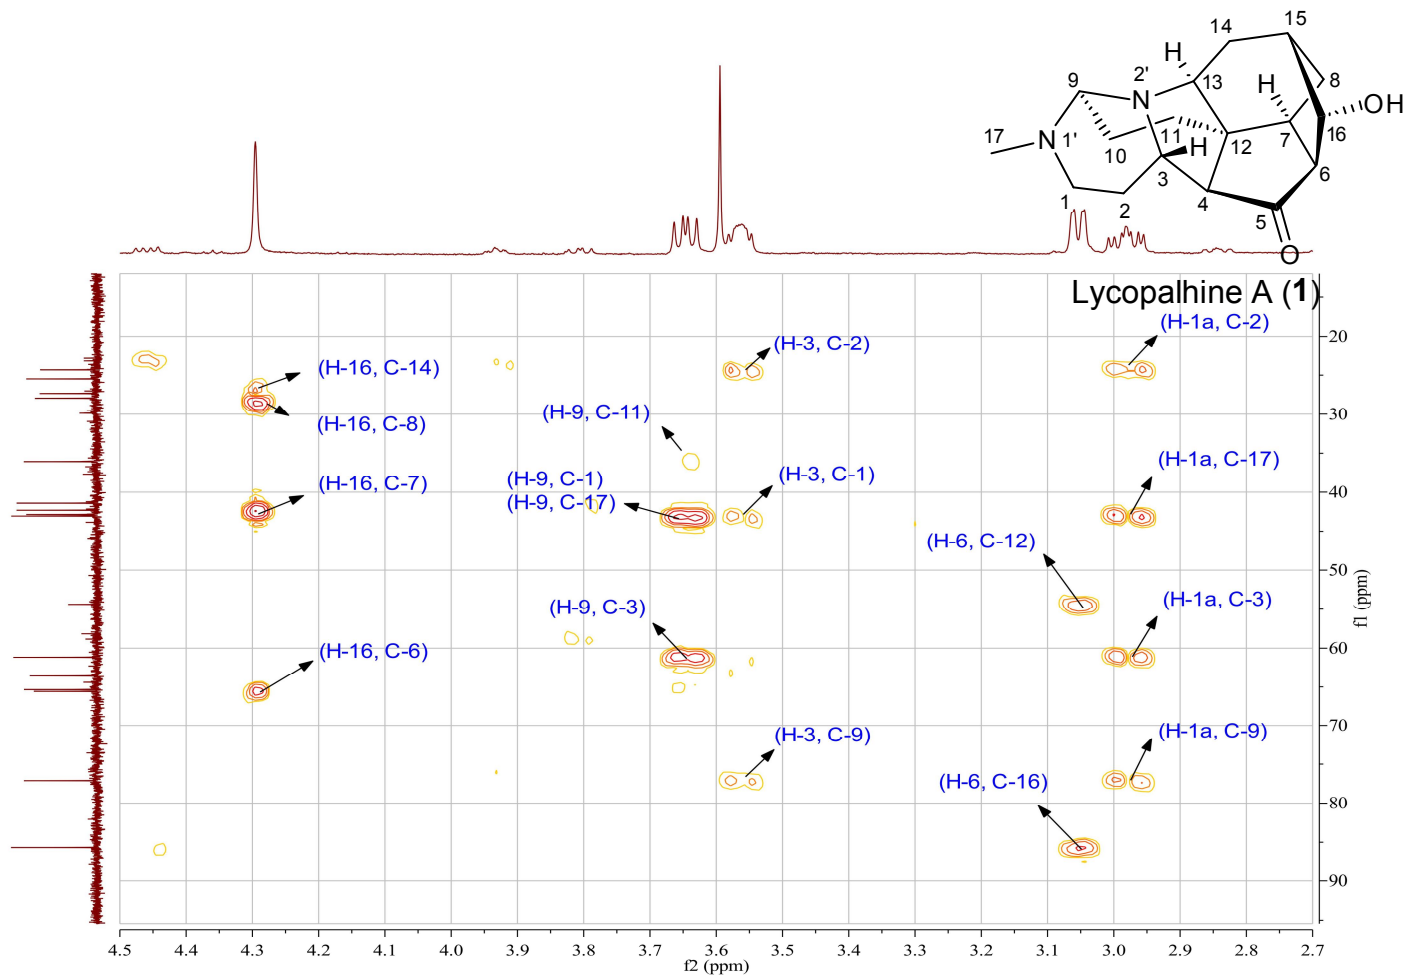

Figure S11. HMBC spectrum ( $\delta_{\text{H}}$  0.6–2.9 ppm and  $\delta_{\text{C}}$  15–95 ppm) of lycopalhine A (**1**) in pyridine- $d_5$

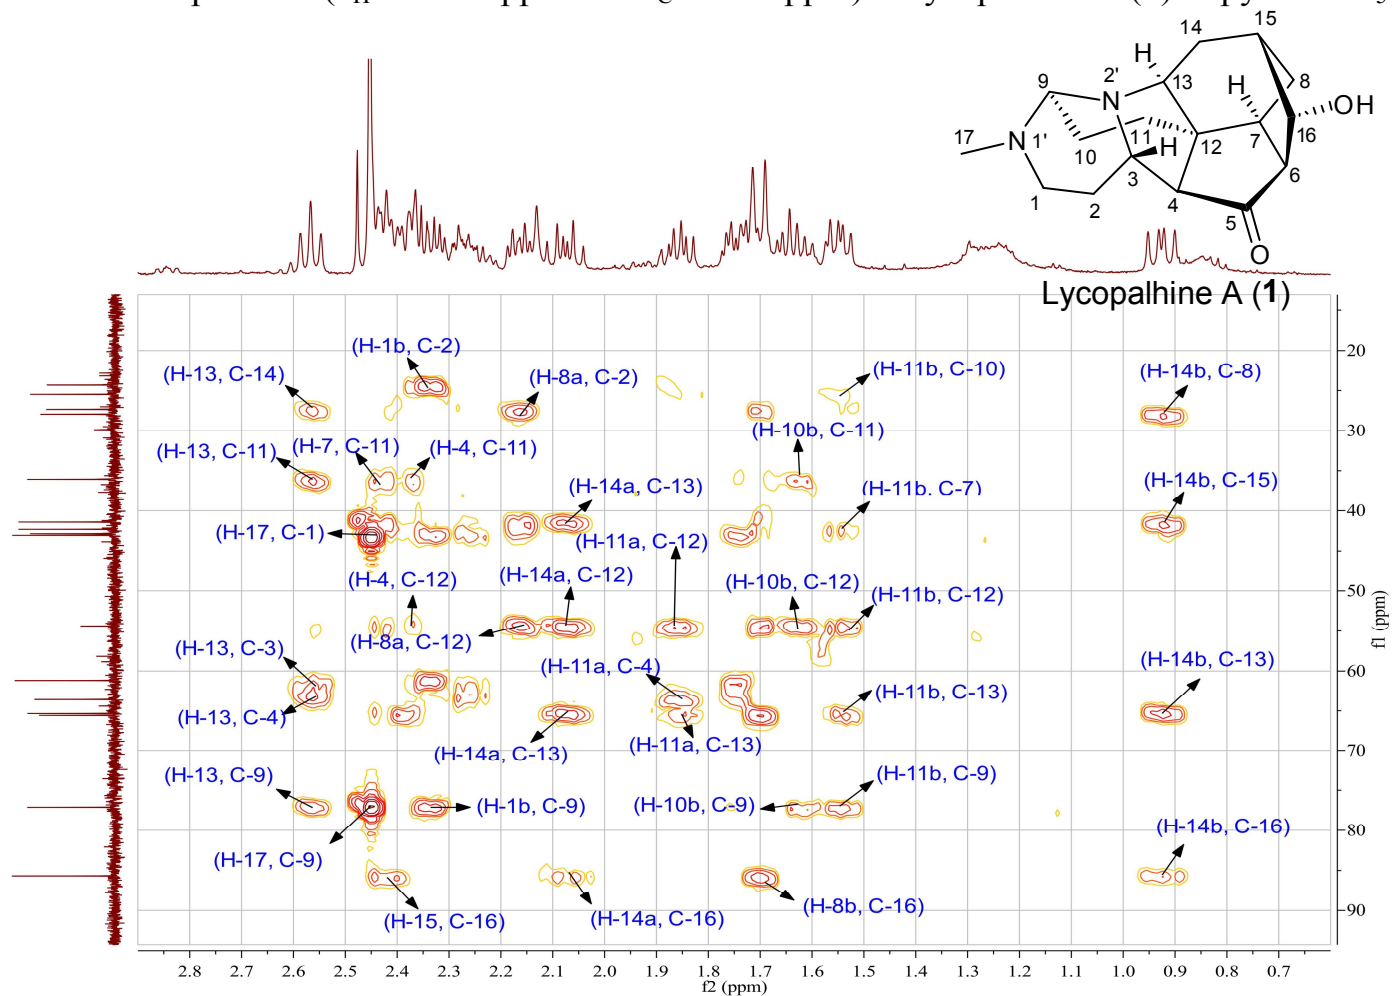

Figure S12. ROESY spectrum (0.5–4.5 ppm) of lycopalhine A (**1**) in pyridine-*d*<sub>5</sub>

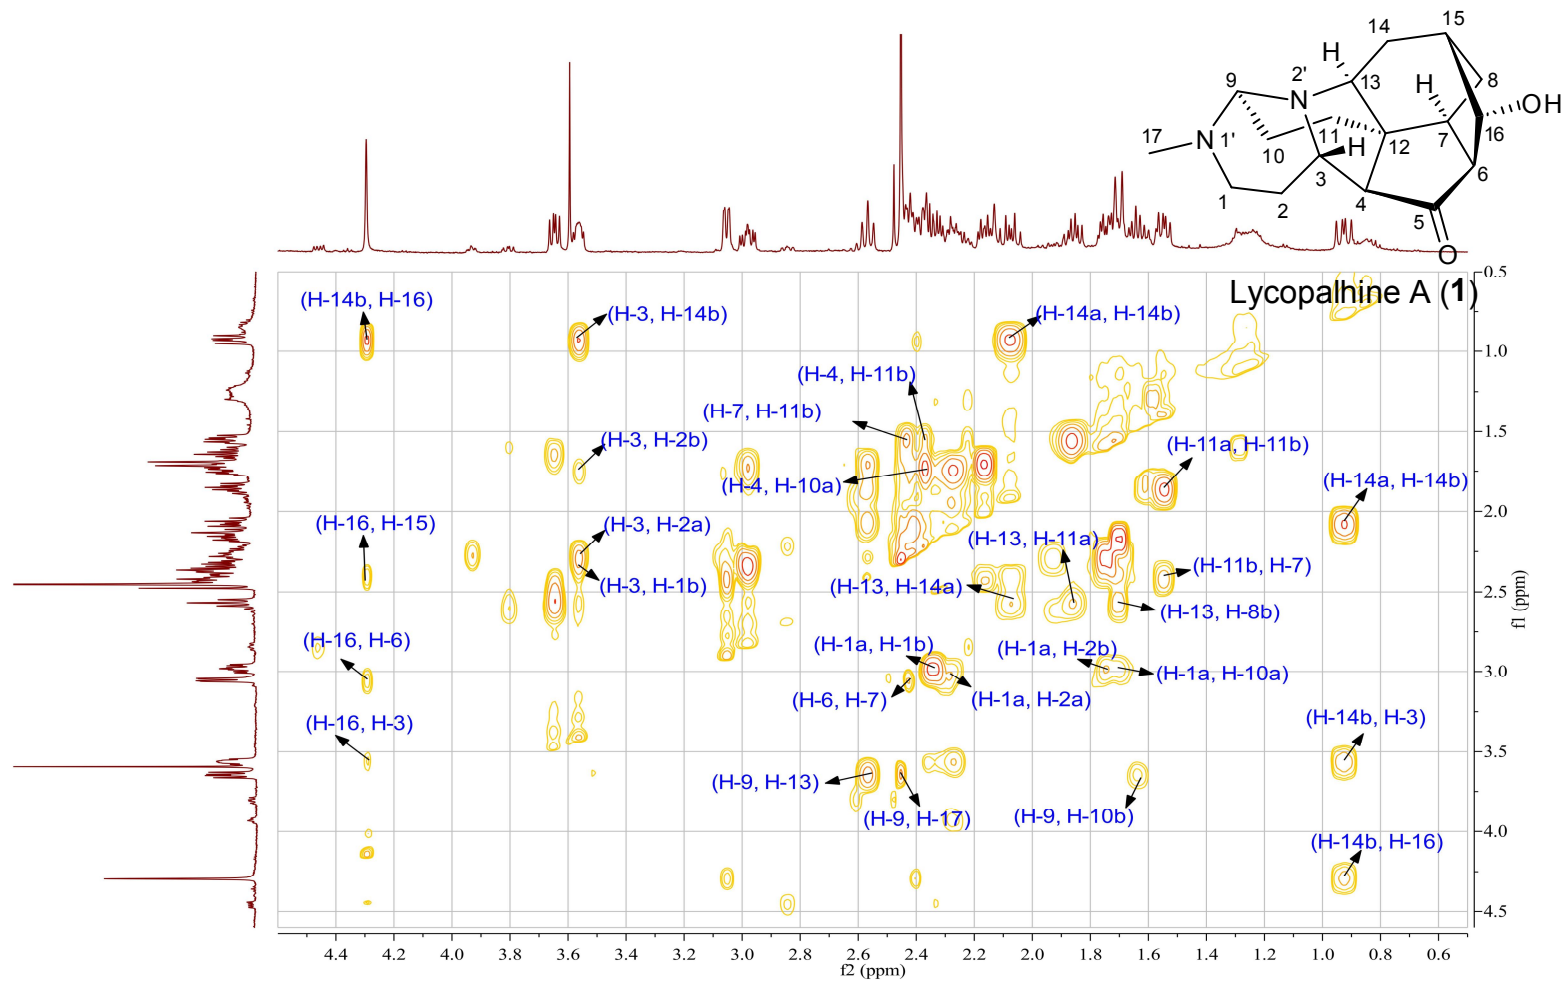

Figure S13. Positive ESIMS spectrum of lycopalhine A (1)

| Mass Spectrum List Report    |                                     |              |                                        |                          |         |
|------------------------------|-------------------------------------|--------------|----------------------------------------|--------------------------|---------|
| <b>Analysis Info</b>         |                                     |              | Acquisition Date 6/21/2011 11:35:05 AM |                          |         |
| Analysis Name                | D:\DATA\2011file\110622\fax-16000.d |              | Operator                               | QUYAN                    |         |
| Method                       | ms_ptservice.m                      |              | Instrument                             | HCT                      |         |
| Sample Name                  | fax-16                              |              | Comment                                |                          |         |
| <b>Acquisition Parameter</b> |                                     |              |                                        |                          |         |
| Ion Source Type              | ESI                                 | Ion Polarity | Positive                               | Alternating Ion Polarity | off     |
| Mass Range Mode              | Std/Enhanced                        | Scan Begin   | 100 m/z                                | Scan End                 | 800 m/z |
| Capillary Exit               | 200.0 Volt                          | Skimmer      | 40.0 Volt                              | Trap Drive               | 50.2    |
| Accumulation Time            | 200 µs                              | Averages     | 7 Spectra                              | Auto MS/MS               | off     |

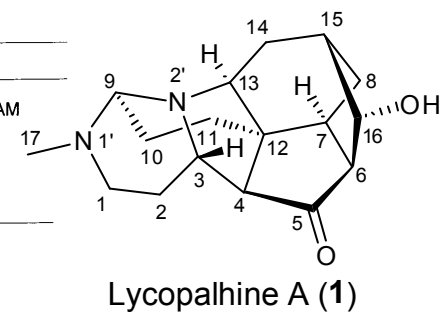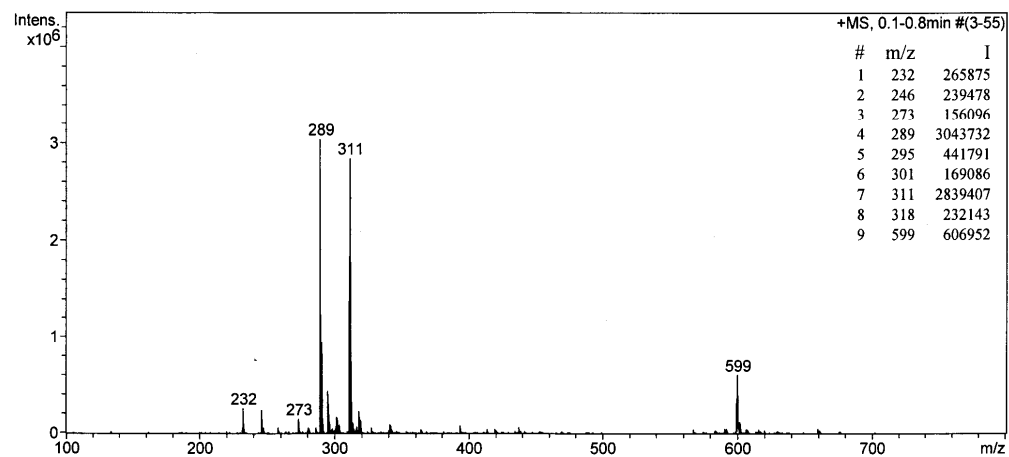

Figure S14. HRESIMS spectrum of lycopalhine A (1)

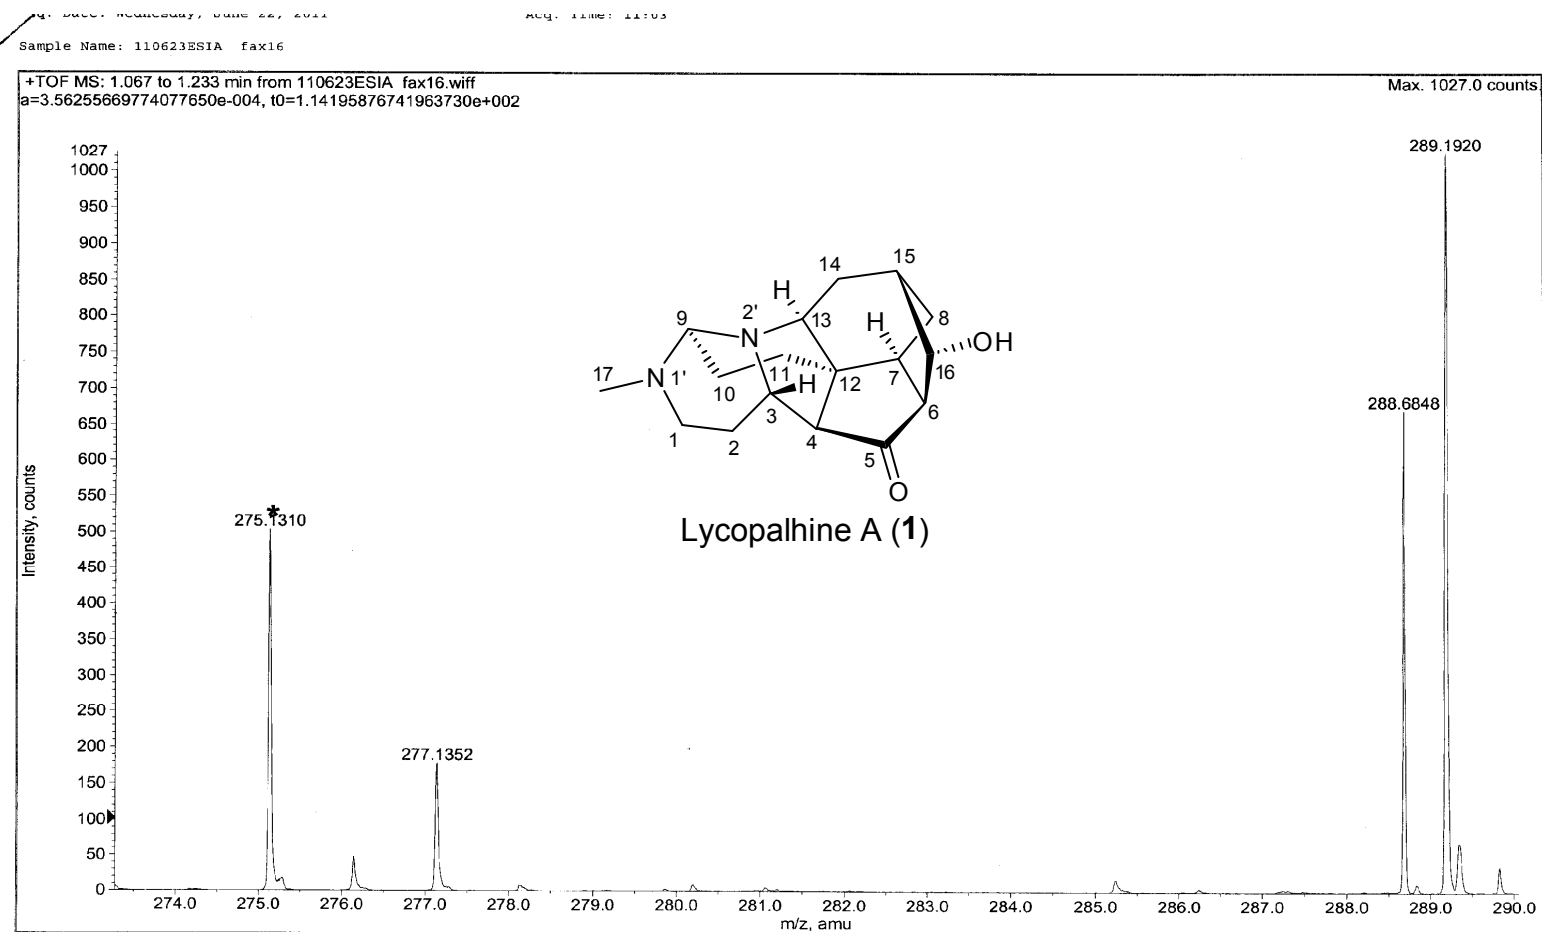

Figure S15. HRESIMS report of lycopalhine A (1)

Acq. Date: Wednesday, June 22, 2011  
 Sample Name: 110623ESIA fax16

Acq. Time: 11:03

Elemental composition calculator

Target m/z: +289.1920 amu  
 Tolerance: +10.0000 ppm  
 Result type: Elemental  
 Max num of results: 1000  
 Min DBE: -10.0000 Max DBE: +60.0000  
 Electron state: OddAndEven  
 Num of charges: 0  
 Add water: N/A  
 Add proton: N/A  
 File Name: 110623ESIA fax16.wiff

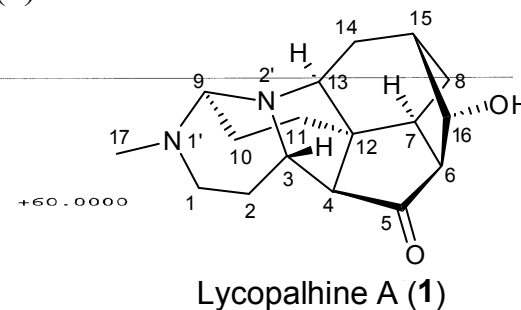

|    | Elements | Min Number | Max Number |
|----|----------|------------|------------|
| 1  | Br       | 0          | 0          |
| 2  | C        | 0          | 200        |
| 3  | Cl       | 0          | 0          |
| 4  | F        | 0          | 0          |
| 5  | H        | 0          | 400        |
| 6  | K        | 0          | 0          |
| 7  | N        | 2          | 2          |
| 8  | Na       | 0          | 0          |
| 9  | O        | 0          | 2          |
| 10 | P        | 0          | 0          |

Sample Name: 110623ESIA fax16

Acq. Time: 11:03

|    | Elements | Min Number | Max Number |
|----|----------|------------|------------|
| 11 | Pt       | 0          | 0          |
| 12 | S        | 0          | 0          |
| 13 | Si       | 0          | 0          |

|   | Formula       | Calculated m/z (amu) | mDa Error | PPM Error | DBE |
|---|---------------|----------------------|-----------|-----------|-----|
| 1 | C17 H25 N2 O2 | 289.1916             | 0.3967    | 1.3717    | 6.5 |



Figure S16. ECD and UV spectra of lycopalhine A (1) in methanol

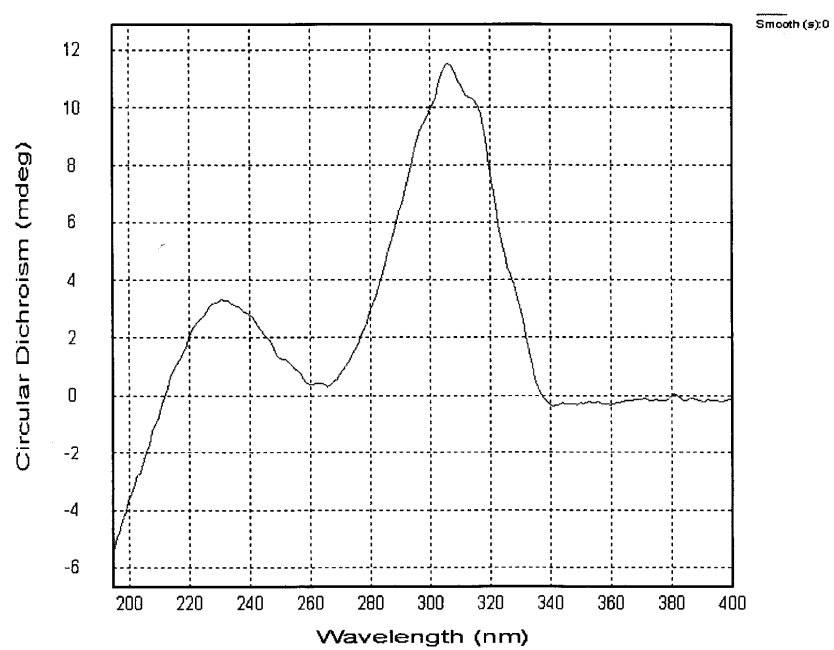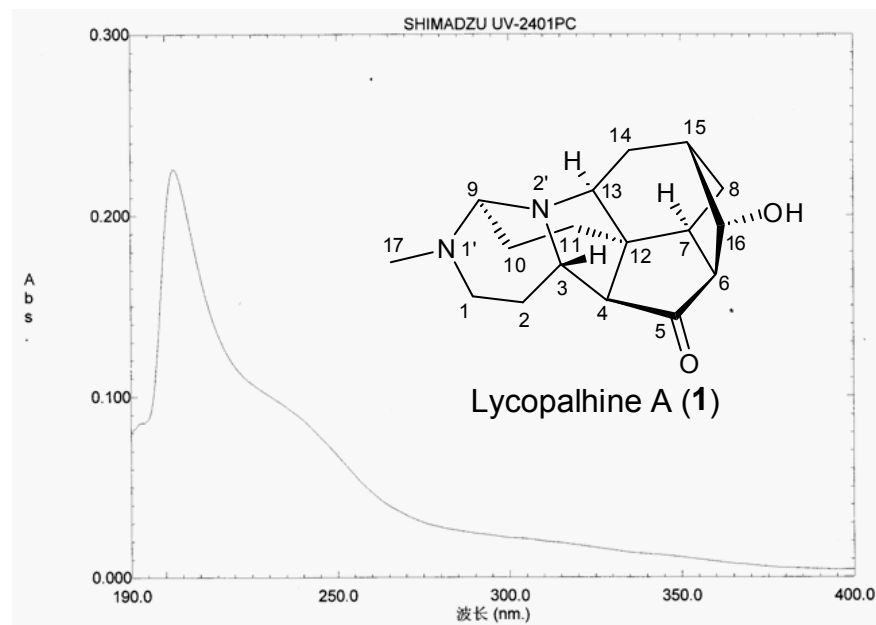

Figure S17. IR spectrum of lycopalhine A (1)

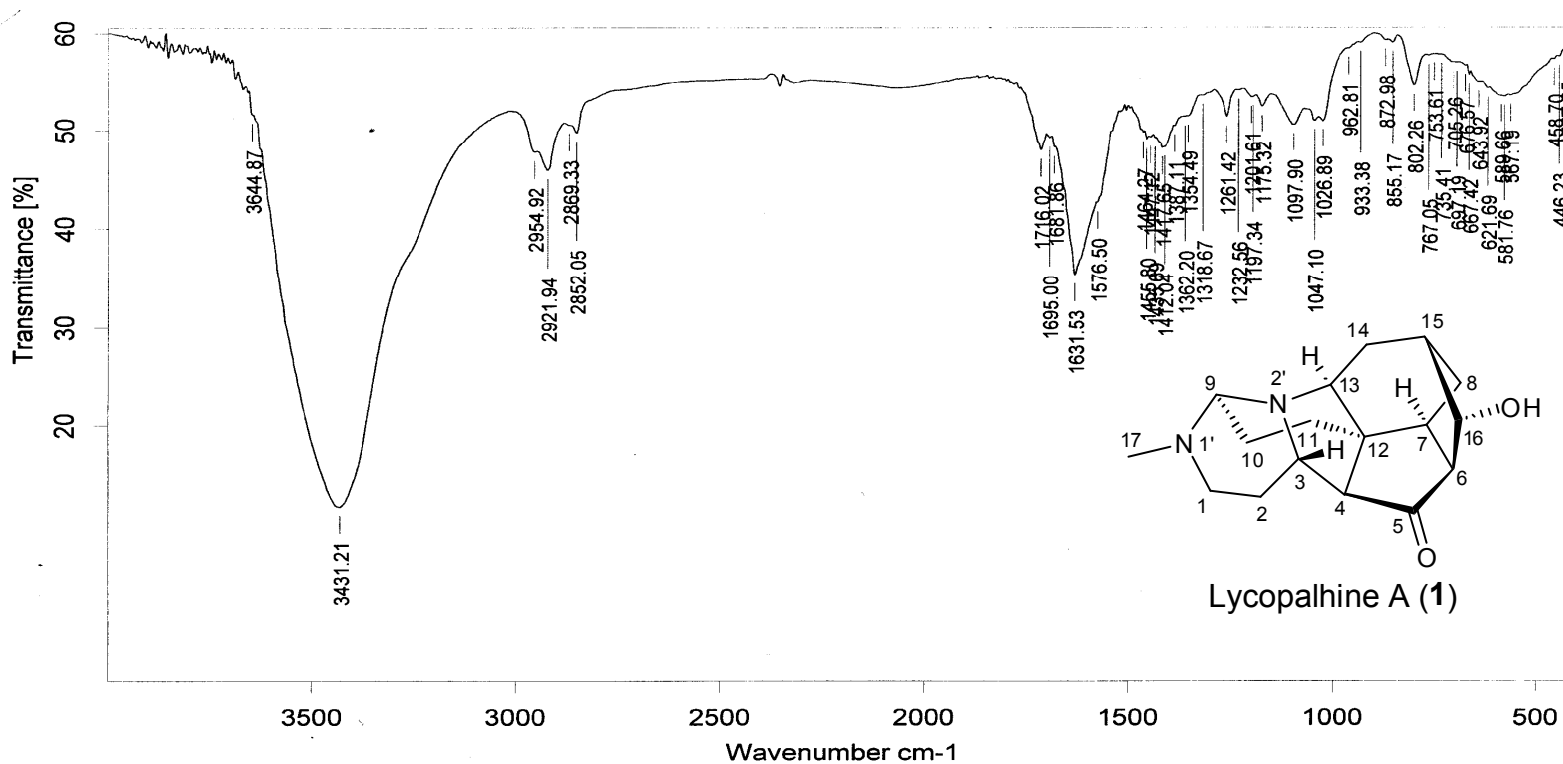

|                      |                                     |                          |
|----------------------|-------------------------------------|--------------------------|
| Sample : fax16a      | Frequency Range : 399.246 - 3996.32 | Measured on : 21/12/2011 |
| Technique : KBr压片    | Resolution : 4                      | Instrument : Tensor27    |
| Customer : 111221IR2 | Zerofilling : 2                     | Sample Scans : 16        |
|                      | Acquisition : Double Sided,For      |                          |

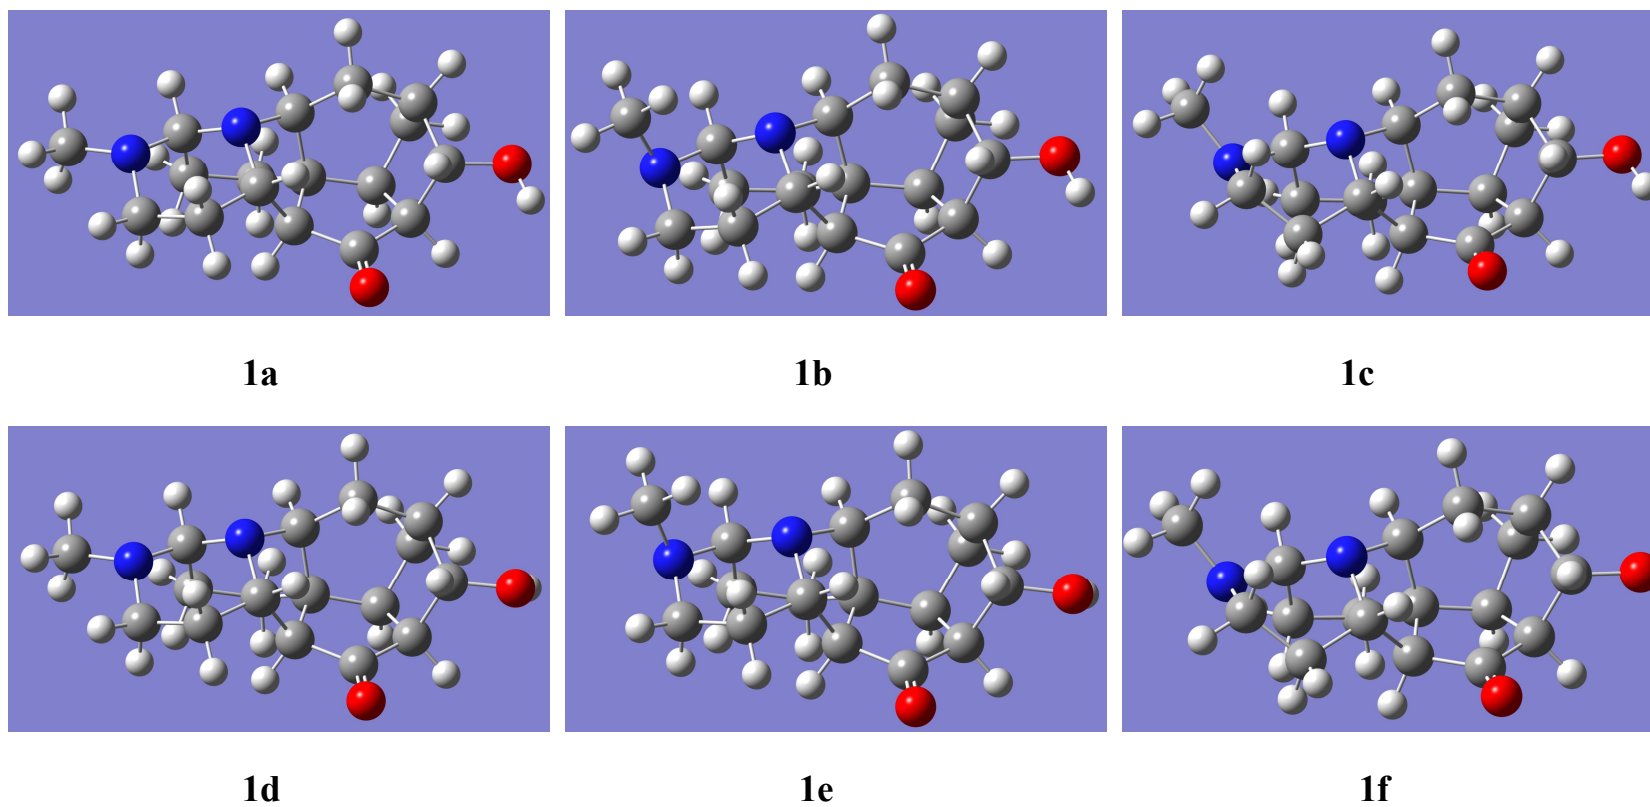

Figure S18. Optimized geometries of lycopalhine A (**1**) at the B3LYP/6-31+g (d,p) level in the gas phase.

**Table S1.** Conformational analysis of lycopalhine A (**1**) at the B3LYP/6-31+G(d,p) level of theory (kcal/mol).

| Conformers | In the gas phase |           |            |           | In methanol (PCM model) |           |            |           | In pyridine (PCM model) |           |            |           |
|------------|------------------|-----------|------------|-----------|-------------------------|-----------|------------|-----------|-------------------------|-----------|------------|-----------|
|            | $\Delta E$       | $P_E$ (%) | $\Delta G$ | $P_G$ (%) | $\Delta E$              | $P_E$ (%) | $\Delta G$ | $P_G$ (%) | $\Delta E$              | $P_E$ (%) | $\Delta G$ | $P_G$ (%) |
| <b>1a</b>  | 0.88             | 10.4      | 1.03       | 9.5       | 0                       | 27.9      | 0.02       | 26.9      | 0.09                    | 26.0      | 0.09       | 26.2      |
| <b>1b</b>  | 0                | 45.3      | 0.30       | 31.7      | 0.03                    | 26.5      | 0.21       | 19.4      | 0                       | 30.2      | 0.21       | 21.3      |
| <b>1c</b>  | 0.08             | 39.4      | 0          | 52.8      | 0.23                    | 18.9      | 0          | 27.7      | 0.20                    | 21.5      | 0          | 30.5      |
| <b>1d</b>  | 2.66             | 0.5       | 2.75       | 0.5       | 0.59                    | 10.3      | 0.62       | 9.7       | 0.82                    | 7.6       | 0.85       | 7.3       |
| <b>1e</b>  | 1.77             | 2.3       | 1.91       | 2.1       | 0.6                     | 10        | 0.89       | 6.1       | 0.71                    | 9.1       | 1.03       | 5.5       |
| <b>1f</b>  | 1.83             | 2.1       | 1.63       | 3.4       | 0.86                    | 6.4       | 0.59       | 10.2      | 0.97                    | 5.7       | 0.71       | 9.2       |

**Table S2.** Calculated, experimental chemical shifts, and the relative errors of lycopalhine A (**1**) at the mPW1PW91-SCRF/6-311+G(2d,p) level of theory in PCM solvent continuum model with pyridine as a solvent

| NO. | <i>Exptl.</i> <sup>a</sup> | <i>Calcd.</i> <sup>b</sup> | <i>Corr.</i> <sup>c</sup> | $\Delta\delta^d$ | No. | <i>Exptl.</i> <sup>a</sup> | <i>Calcd.</i> <sup>b</sup> | <i>Corr.</i> <sup>c</sup> | $\Delta\delta^d$ |
|-----|----------------------------|----------------------------|---------------------------|------------------|-----|----------------------------|----------------------------|---------------------------|------------------|
| 1   | 43.06 (t)                  | 45.68                      | 42.09                     | 0.97             | 10  | 25.48 (t)                  | 27.3                       | 24.74                     | 0.74             |
| 2   | 24.32 (t)                  | 28.36                      | 25.75                     | 1.43             | 11  | 36.07 (t)                  | 38.96                      | 35.74                     | 0.33             |
| 3   | 61.17 (d)                  | 65.66                      | 60.94                     | 0.23             | 12  | 54.38 (s)                  | 60.63                      | 56.20                     | 1.82             |
| 4   | 63.57 (d)                  | 69.2                       | 64.28                     | 0.71             | 13  | 65.35 (d)                  | 69.49                      | 64.56                     | 0.79             |
| 5   | 221.56 (s)                 | 236.16                     | 221.82                    | 0.26             | 14  | 27.34 (t)                  | 30.56                      | 27.82                     | 0.48             |
| 6   | 65.58 (d)                  | 72.22                      | 67.13                     | 1.55             | 15  | 41.41 (d)                  | 45.38                      | 41.80                     | 0.39             |
| 7   | 42.31 (d)                  | 47.15                      | 43.48                     | 1.17             | 16  | 85.68 (d)                  | 91.67                      | 85.48                     | 0.20             |
| 8   | 27.95 (t)                  | 30.77                      | 28.02                     | 0.07             | 17  | 42.86 (q)                  | 43.6                       | 40.13                     | 2.73             |
| 9   | 77.12 (d)                  | 81.1                       | 75.51                     | 1.61             |     |                            |                            |                           |                  |

<sup>a</sup> in 125 MHz. <sup>b</sup> Boltzmann-calculated population-weighted averages of **1a–1f**. <sup>c</sup>  $\delta_{\text{corr.}} = (\delta_{\text{calcd.}} - \text{intercept})/\text{slope}$  (see Figure S19). <sup>d</sup>  $\Delta\delta = |\delta_{\text{corr.}} - \delta_{\text{exptl.}}|$ . (see ref. 9 in the manuscript).

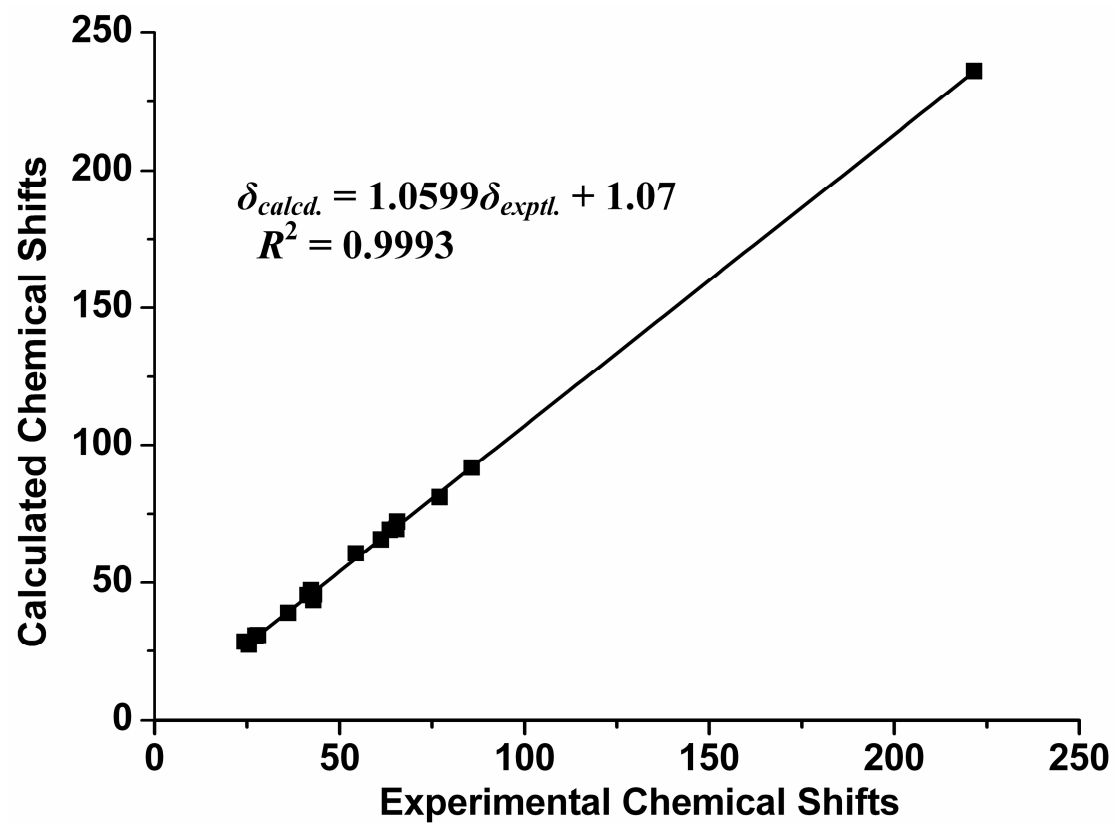

Figure S19. Regression analysis of experimental vs. calculated  $^{13}\text{C}$  NMR chemical shifts (ppm). The general correlation is very satisfactory ( $R^2 = 0.9993$ ) (see ref. 9 in the manuscript).

**Table S2.** Optimized Z-Matrixes of lycopalhine A (**1**) at the B3LYP/6-31+G(d,p) level of theory in the gas phase (Å)

| <b>1a</b> |           |           |           | <b>1b</b> |           |           |           | <b>1c</b> |           |           |           |
|-----------|-----------|-----------|-----------|-----------|-----------|-----------|-----------|-----------|-----------|-----------|-----------|
| C         | 2.622511  | -0.98174  | -1.080471 | C         | 2.530778  | -0.975266 | -1.147374 | C         | 2.491854  | -1.018059 | -1.183777 |
| C         | 1.213495  | -0.868698 | -1.726106 | C         | 1.072836  | -0.925774 | -1.683815 | C         | 1.035268  | -0.732592 | -1.661714 |
| C         | 0.046795  | -1.078142 | -0.726518 | C         | -0.005296 | -1.129169 | -0.588453 | C         | -0.027937 | -0.985582 | -0.568142 |
| C         | 0.334881  | -0.659787 | 0.75617   | C         | 0.3823    | -0.640524 | 0.849329  | C         | 0.401669  | -0.567402 | 0.872303  |
| C         | 1.831558  | -0.797776 | 1.154036  | C         | 1.909762  | -0.718833 | 1.132951  | C         | 1.926551  | -0.756379 | 1.112383  |
| C         | 2.559842  | -1.793697 | 0.23089   | C         | 2.594929  | -1.73245  | 0.196015  | C         | 2.49831   | -1.811478 | 0.141995  |
| C         | -0.021729 | 0.851265  | 0.748883  | C         | -0.020309 | 0.859022  | 0.808926  | C         | 0.107269  | 0.951795  | 0.845594  |
| C         | 1.309865  | 1.58374   | 0.769207  | C         | 1.284963  | 1.62819   | 0.689663  | C         | 1.449124  | 1.6146    | 0.572084  |
| C         | 2.458146  | 0.58046   | 0.811485  | C         | 2.464208  | 0.660698  | 0.686258  | C         | 2.57273   | 0.583383  | 0.651082  |
| C         | -0.831052 | 1.065833  | -0.592545 | C         | -0.945816 | 0.991029  | -0.466834 | C         | -0.973099 | 1.145008  | -0.281688 |
| C         | -0.641813 | -1.485482 | 1.603391  | C         | -0.498519 | -1.454483 | 1.807896  | C         | -0.527364 | -1.324211 | 1.836681  |
| C         | -2.10064  | -1.202749 | 1.17579   | C         | -1.994445 | -1.211259 | 1.505556  | C         | -2.009437 | -0.98151  | 1.55411   |
| C         | -2.058404 | 1.983389  | -0.589169 | C         | -2.204961 | 1.86805   | -0.395027 | C         | -2.264714 | 1.888346  | 0.118258  |

|   |           |           |           |   |           |           |           |   |           |           |           |
|---|-----------|-----------|-----------|---|-----------|-----------|-----------|---|-----------|-----------|-----------|
| C | -2.326694 | -0.878619 | -0.349257 | C | -2.350725 | -0.991418 | -0.000126 | C | -2.356059 | -0.857302 | 0.040531  |
| N | -3.485949 | -0.009406 | -0.574629 | N | -3.581547 | -0.218448 | -0.10151  | N | -3.635049 | -0.15441  | -0.147199 |
| C | -3.317533 | 1.330016  | -0.016199 | C | -3.386587 | 1.181439  | 0.309934  | C | -3.475103 | 1.247712  | -0.560486 |
| O | 1.448057  | 2.794136  | 0.721776  | O | 1.381191  | 2.838378  | 0.577266  | O | 1.609221  | 2.790645  | 0.296316  |
| C | 3.143693  | 0.382936  | -0.588601 | C | 3.048055  | 0.421914  | -0.753051 | C | 3.190403  | 0.285689  | -0.758483 |
| O | 4.564405  | 0.278191  | -0.464413 | O | 4.476571  | 0.359239  | -0.733274 | O | 4.593018  | 0.021218  | -0.676381 |
| C | -4.757328 | -0.620893 | -0.216326 | C | -4.24807  | -0.35358  | -1.39851  | C | -4.563368 | -0.854156 | -1.028095 |
| N | -1.156644 | -0.296649 | -1.057387 | N | -1.258981 | -0.402537 | -0.846223 | N | -1.276775 | -0.230198 | -0.768043 |
| H | 3.333016  | -1.390968 | -1.804449 | H | 3.194831  | -1.395721 | -1.908132 | H | 3.068705  | -1.502623 | -1.976518 |
| H | 1.111917  | 0.094379  | -2.237717 | H | 0.937801  | -1.713224 | -2.432464 | H | 0.95998   | 0.296114  | -2.03285  |
| H | 1.115638  | -1.624906 | -2.511694 | H | 0.90379   | 0.014992  | -2.219179 | H | 0.791984  | -1.367603 | -2.519453 |
| H | -0.219675 | -2.140306 | -0.753963 | H | -0.235471 | -2.199787 | -0.552598 | H | -0.269544 | -2.053759 | -0.584866 |
| H | 1.926901  | -1.045776 | 2.217293  | H | 2.094656  | -0.918463 | 2.194463  | H | 2.131543  | -0.980499 | 2.164878  |
| H | 3.569976  | -2.001486 | 0.596721  | H | 3.636312  | -1.896725 | 0.488867  | H | 3.524101  | -2.079898 | 0.409875  |
| H | 2.036479  | -2.750907 | 0.128032  | H | 2.094462  | -2.707005 | 0.172941  | H | 1.907201  | -2.73309  | 0.109411  |



|   |           |           |           |   |           |           |           |   |           |           |           |
|---|-----------|-----------|-----------|---|-----------|-----------|-----------|---|-----------|-----------|-----------|
| H | -0.608368 | 1.170391  | 1.618925  | H | -0.541789 | 1.198754  | 1.712231  | H | -0.258499 | 1.336047  | 1.806887  |
| H | 3.211379  | 0.926693  | 1.525298  | H | 3.257606  | 1.059342  | 1.325368  | H | 3.357702  | 0.961498  | 1.313432  |
| H | -0.134979 | 1.496132  | -1.319228 | H | -0.327211 | 1.412995  | -1.265673 | H | -0.513988 | 1.690725  | -1.11225  |
| H | -0.397423 | -2.550263 | 1.489429  | H | -0.242703 | -2.518201 | 1.708836  | H | -0.349665 | -2.403301 | 1.729025  |
| H | -0.521693 | -1.252588 | 2.670019  | H | -0.289113 | -1.18175  | 2.850763  | H | -0.285782 | -1.072276 | 2.877986  |
| H | -2.740606 | -2.05015  | 1.445326  | H | -2.605655 | -2.04314  | 1.870558  | H | -2.674376 | -1.730881 | 1.998481  |
| H | -2.465302 | -0.35876  | 1.768892  | H | -2.317045 | -0.339012 | 2.077644  | H | -2.263599 | -0.038155 | 2.044867  |
| H | -2.261522 | 2.254966  | -1.630589 | H | -2.491189 | 2.111232  | -1.424771 | H | -2.190157 | 2.939599  | -0.175804 |
| H | -1.822115 | 2.906212  | -0.048602 | H | -1.961359 | 2.817372  | 0.095365  | H | -2.409738 | 1.876817  | 1.203832  |
| H | -2.535811 | -1.818765 | -0.873454 | H | -2.544223 | -1.972285 | -0.449316 | H | -2.468033 | -1.868792 | -0.366644 |
| H | -4.19407  | 1.924087  | -0.298266 | H | -4.314109 | 1.726359  | 0.106622  | H | -3.351503 | 1.326235  | -1.656363 |
| H | -3.292382 | 1.330827  | 1.091252  | H | -3.250119 | 1.21676   | 1.395998  | H | -4.391277 | 1.790253  | -0.297469 |
| H | 2.897533  | 1.197316  | -1.282273 | H | 2.727383  | 1.199646  | -1.458256 | H | 3.01082   | 1.109388  | -1.460351 |
| H | 4.918881  | 1.138147  | -0.202354 | H | 4.824237  | 1.237486  | -0.529142 | H | 5.055508  | 0.847248  | -0.483495 |
| H | -5.574688 | 0.003205  | -0.59298  | H | -3.67028  | 0.040996  | -2.248595 | H | -4.199776 | -0.929674 | -2.070058 |

|           |           |           |           |           |           |           |           |           |           |           |           |
|-----------|-----------|-----------|-----------|-----------|-----------|-----------|-----------|-----------|-----------|-----------|-----------|
| H         | -4.90807  | -0.749373 | 0.872104  | H         | -5.21251  | 0.163125  | -1.359039 | H         | -5.519565 | -0.319919 | -1.041548 |
| H         | -4.840117 | -1.604666 | -0.690466 | H         | -4.44532  | -1.413298 | -1.590338 | H         | -4.75378  | -1.863286 | -0.649611 |
| <b>1d</b> |           |           |           | <b>1e</b> |           |           |           | <b>1f</b> |           |           |           |
| C         | 2.624904  | -0.974964 | -1.084707 | C         | 2.534192  | -0.965233 | -1.152948 | C         | 2.49548   | -1.008094 | -1.189625 |
| C         | 1.21406   | -0.857843 | -1.72743  | C         | 1.074599  | -0.90507  | -1.686635 | C         | 1.037669  | -0.717189 | -1.663434 |
| C         | 0.04842   | -1.074191 | -0.728979 | C         | -0.002801 | -1.121304 | -0.593772 | C         | -0.026039 | -0.979941 | -0.573024 |
| C         | 0.33598   | -0.656641 | 0.754106  | C         | 0.3831    | -0.636518 | 0.845765  | C         | 0.4022    | -0.567981 | 0.869982  |
| C         | 1.833324  | -0.788649 | 1.151335  | C         | 1.910812  | -0.709185 | 1.128683  | C         | 1.92781   | -0.75219  | 1.109073  |
| C         | 2.554259  | -1.78911  | 0.225898  | C         | 2.586999  | -1.727714 | 0.188933  | C         | 2.490441  | -1.80826  | 0.1329    |
| C         | -0.023233 | 0.852118  | 0.748504  | C         | -0.022382 | 0.860509  | 0.809144  | C         | 0.105978  | 0.949401  | 0.850527  |
| C         | 1.306607  | 1.590358  | 0.768911  | C         | 1.280875  | 1.635084  | 0.685682  | C         | 1.445975  | 1.617709  | 0.575031  |
| C         | 2.461499  | 0.589687  | 0.807394  | C         | 2.467118  | 0.670832  | 0.681801  | C         | 2.575932  | 0.589078  | 0.65046   |
| C         | -0.834585 | 1.067006  | -0.591228 | C         | -0.952451 | 0.993927  | -0.462841 | C         | -0.975985 | 1.146556  | -0.274204 |
| C         | -0.637145 | -1.486857 | 1.60106   | C         | -0.492927 | -1.458063 | 1.802099  | C         | -0.524243 | -1.332941 | 1.830356  |
| C         | -2.096921 | -1.207724 | 1.174263  | C         | -1.989956 | -1.220778 | 1.50124   | C         | -2.007214 | -0.99288  | 1.548783  |
| C         | -2.064593 | 1.980874  | -0.5849   | C         | -2.215744 | 1.864461  | -0.384248 | C         | -2.269424 | 1.883568  | 0.131337  |

|   |           |           |           |   |           |           |           |   |           |           |           |
|---|-----------|-----------|-----------|---|-----------|-----------|-----------|---|-----------|-----------|-----------|
| C | -2.324949 | -0.882351 | -0.350433 | C | -2.348187 | -0.997295 | -0.003453 | C | -2.354065 | -0.861559 | 0.035699  |
| N | -3.486413 | -3.486413 | -0.57381  | N | -3.58234  | -0.229863 | -0.100641 | N | -3.634547 | -0.161309 | -0.148306 |
| C | -3.321656 | 1.322829  | -0.012867 | C | -3.39387  | 1.169019  | 0.317706  | C | -3.478277 | 1.244469  | -0.551472 |
| O | 1.433485  | 2.800643  | 0.732248  | O | 1.366221  | 2.844833  | 0.578575  | O | 1.595631  | 2.794443  | 0.303416  |
| C | 3.154429  | 0.393627  | -0.590072 | C | 3.064666  | 0.433127  | -0.752688 | C | 3.200363  | 0.298687  | -0.757951 |
| O | 4.57762   | 0.428315  | -0.493654 | O | 4.48997   | 0.500475  | -0.758243 | O | 4.620801  | 0.179329  | -0.712734 |
| C | -4.756194 | -0.631932 | -0.217078 | C | -4.249148 | -0.362051 | -1.397855 | C | -4.559886 | -0.857316 | -1.03547  |
| N | -1.156791 | -0.296052 | -1.058347 | N | -1.259523 | -0.399923 | -0.847976 | N | -1.276062 | -0.226893 | -0.769    |
| H | 3.328753  | -1.387128 | -1.814264 | H | 3.190341  | -1.389722 | -1.918971 | H | 3.06624   | -1.492257 | -1.987585 |
| H | 1.114318  | -1.605493 | -2.520974 | H | 0.935364  | -1.678514 | -2.449007 | H | 0.966743  | 0.316442  | -2.021015 |
| H | 1.115458  | 0.110873  | -2.228559 | H | 0.911097  | 0.045886  | -2.205173 | H | 0.793172  | -1.340513 | -2.529342 |
| H | -0.214694 | -2.137295 | -0.758816 | H | -0.227483 | -2.193432 | -0.563966 | H | -0.265545 | -2.048654 | -0.596605 |
| H | 1.92905   | -1.038328 | -1.038328 | H | 2.095943  | -0.911784 | 2.18963   | H | 2.132473  | -0.981902 | 2.160538  |
| H | 3.557852  | -2.025787 | 0.603566  | H | 2.079939  | -2.69835  | 0.163206  | H | 3.506842  | -2.113786 | 0.413672  |
| H | 2.027565  | -2.743957 | 0.12232   | H | 3.622605  | -1.925404 | 0.495331  | H | 1.893748  | -2.725577 | 0.095476  |

|   |           |           |           |   |           |           |           |   |           |           |           |
|---|-----------|-----------|-----------|---|-----------|-----------|-----------|---|-----------|-----------|-----------|
| H | -0.609087 | 1.168787  | 1.619859  | H | -0.540347 | 1.197598  | 1.715392  | H | -0.258107 | 1.328945  | 1.814206  |
| H | 3.214293  | 0.949726  | 1.514444  | H | 3.256158  | 1.084299  | 1.316485  | H | 3.361387  | 0.976508  | 1.306222  |
| H | -0.140945 | 1.501152  | -1.317808 | H | -0.33849  | 1.423294  | -1.261121 | H | -0.51924  | 1.699084  | -1.101441 |
| H | -0.39018  | -2.551065 | 1.485738  | H | -0.232579 | -2.520515 | 1.699359  | H | -0.343991 | -2.41123  | 1.717336  |
| H | -0.517314 | -1.254787 | 2.667885  | H | -0.284302 | -1.187855 | 2.845763  | H | -0.283948 | -1.085517 | 2.873016  |
| H | -2.734311 | -2.057201 | 1.443251  | H | -2.596988 | -2.056763 | 1.863745  | H | -2.670071 | -1.746361 | 1.989162  |
| H | -2.463305 | -0.365363 | 1.768476  | H | -2.315892 | -0.352058 | 2.07664   | H | -2.263644 | -0.052789 | 2.044309  |
| H | -2.26893  | 2.254512  | -1.625495 | H | -2.504025 | 2.112482  | -1.412211 | H | -2.197443 | 2.936855  | -0.155773 |
| H | -1.83015  | 2.902959  | -0.042387 | H | -1.975424 | 2.81197   | 0.111113  | H | -2.41393  | 1.864645  | 1.216869  |
| H | -2.531753 | -1.822477 | -0.875641 | H | -2.53735  | -1.977434 | -0.456174 | H | -2.463246 | -1.871178 | -0.376918 |
| H | -4.199909 | 1.914833  | -0.293751 | H | -4.323978 | 1.710427  | 0.11708   | H | -3.355173 | 1.330884  | -1.646732 |
| H | -3.296539 | 1.32153   | 1.094542  | H | -3.25768  | 1.199809  | 1.403906  | H | -4.39582  | 1.782597  | -0.284467 |
| H | 2.917963  | 1.206608  | -1.281227 | H | 2.761699  | 1.212374  | -1.456645 | H | 3.024635  | 1.122632  | -1.453505 |
| H | 4.878433  | -0.278584 | 0.09326   | H | 4.846853  | -0.170162 | -0.160238 | H | 4.867763  | -0.548986 | -0.127374 |
| H | -5.575094 | -0.009125 | -0.592409 | H | -4.440932 | -1.421832 | -1.594857 | H | -4.194711 | -0.924313 | -2.077409 |

|   |           |           |           |   |           |          |           |   |           |           |           |
|---|-----------|-----------|-----------|---|-----------|----------|-----------|---|-----------|-----------|-----------|
| H | -4.906775 | -0.763255 | 0.871026  | H | -3.674134 | 0.039962 | -2.24628  | H | -5.517359 | -0.32541  | -1.04637  |
| H | -4.836336 | -1.614793 | -0.693569 | H | -5.216254 | 0.149283 | -1.355009 | H | -4.748263 | -1.869578 | -0.664396 |

**Table S3.** Frequencies of lycopalhine A (**1**) at the B3LYP/6-31+G(d,p) level of theory in the gas phase (cm<sup>-1</sup>)

| <b>1a</b> |          |          | <b>1b</b> |          |          | <b>1c</b> |          |          |
|-----------|----------|----------|-----------|----------|----------|-----------|----------|----------|
| 50.0778   | 101.3007 | 119.1174 | 55.1878   | 97.2967  | 112.439  | 61.246    | 84.386   | 122.9415 |
| 143.2619  | 169.1197 | 206.4965 | 143.0156  | 163.1421 | 197.5896 | 148.9511  | 177.1694 | 193.2592 |
| 222.9624  | 245.1599 | 255.4839 | 211.1203  | 232.0296 | 252.4292 | 224.5381  | 239.9286 | 253.2009 |
| 262.9668  | 286.2146 | 305.285  | 259.8041  | 292.5528 | 307.739  | 259.843   | 293.7625 | 297.2044 |
| 316.5272  | 325.1429 | 349.6246 | 317.9594  | 329.5456 | 342.4811 | 301.3691  | 318.6557 | 345.4349 |
| 361.7338  | 380.1985 | 426.2788 | 376.8606  | 390.3797 | 447.521  | 360.0108  | 384.122  | 420.7534 |
| 452.6821  | 466.2931 | 476.7852 | 458.333   | 469.989  | 486.4657 | 445.6639  | 465.1739 | 483.3966 |
| 491.5965  | 527.7659 | 532.6762 | 492.6789  | 527.3047 | 547.7016 | 496.2528  | 510.7187 | 542.1854 |
| 552.7407  | 582.0758 | 593.4899 | 550.8348  | 578.4474 | 595.2947 | 550.9085  | 560.89   | 606.8395 |
| 631.2065  | 649.9605 | 670.1366 | 627.9775  | 647.8478 | 677.7333 | 626.2148  | 651.1942 | 669.5292 |
| 712.3567  | 742.877  | 769.0116 | 708.3236  | 742.9055 | 764.9494 | 698.9034  | 752.2866 | 783.478  |

|           |           |           |           |           |           |           |           |           |
|-----------|-----------|-----------|-----------|-----------|-----------|-----------|-----------|-----------|
| 789.1115  | 809.4857  | 828.9803  | 790.0862  | 807.892   | 816.359   | 792.0422  | 816.4247  | 827.4757  |
| 849.3289  | 863.0992  | 876.0453  | 849.4448  | 862.2985  | 884.4493  | 854.3084  | 867.4043  | 870.9316  |
| 892.6894  | 897.5338  | 919.2179  | 889.5498  | 898.6591  | 913.8897  | 895.0702  | 916.4459  | 925.0465  |
| 937.3829  | 955.8637  | 962.4005  | 940.1599  | 940.855   | 956.0363  | 934.7292  | 955.3035  | 965.7802  |
| 970.677   | 987.8648  | 994.5889  | 964.3017  | 987.1445  | 993.8662  | 974.5327  | 985.1551  | 998.568   |
| 1011.9998 | 1024.6628 | 1027.827  | 1008.7902 | 1018.0772 | 1031.3442 | 1011.1817 | 1024.7303 | 1034.6043 |
| 1041.4138 | 1057.4978 | 1062.0073 | 1039.7633 | 1051.0627 | 1058.9508 | 1039.3796 | 1054.49   | 1069.4373 |
| 1076.2554 | 1081.7672 | 1097.388  | 1065.3629 | 1071.5893 | 1086.7085 | 1071.5246 | 1081.4642 | 1097.4567 |
| 1106.5771 | 1119.622  | 1126.3191 | 1105.5558 | 1117.3152 | 1123.5735 | 1109.2768 | 1115.305  | 1121.6127 |
| 1139.1481 | 1148.6145 | 1156.7407 | 1138.7107 | 1146.0436 | 1151.7394 | 1129.5408 | 1140.7141 | 1148.3876 |
| 1170.6946 | 1175.7355 | 1191.9813 | 1159.2272 | 1169.8437 | 1189.7159 | 1166.2707 | 1168.8817 | 1177.1493 |
| 1193.2964 | 1199.0369 | 1214.5337 | 1190.9446 | 1196.3138 | 1214.4285 | 1188.8026 | 1194.2766 | 1208.2417 |
| 1220.9909 | 1234.0879 | 1239.3231 | 1221.2636 | 1232.6536 | 1237.6541 | 1214.4911 | 1225.8203 | 1237.7214 |
| 1251.8339 | 1264.5053 | 1266.2108 | 1251.224  | 1260.3416 | 1267.9647 | 1240.7074 | 1247.7696 | 1259.6032 |
| 1277.611  | 1284.9588 | 1304.1624 | 1275.5039 | 1285.8482 | 1304.6178 | 1278.5298 | 1282.3637 | 1301.5038 |

|           |           |           |           |           |           |           |           |           |
|-----------|-----------|-----------|-----------|-----------|-----------|-----------|-----------|-----------|
| 1316.0172 | 1323.191  | 1327.2865 | 1318.3013 | 1323.2253 | 1327.8636 | 1309.7839 | 1317.8776 | 1324.3216 |
| 1335.362  | 1342.9022 | 1345.0726 | 1335.4984 | 1341.0178 | 1343.8932 | 1327.5066 | 1329.1319 | 1337.5367 |
| 1347.7285 | 1350.697  | 1364.6508 | 1348.3199 | 1350.155  | 1363.2126 | 1341.3468 | 1345.6574 | 1354.3401 |
| 1368.1576 | 1375.1605 | 1380.1927 | 1370.8864 | 1375.8936 | 1376.6776 | 1359.9163 | 1367.0275 | 1373.1481 |
| 1382.9527 | 1405.3104 | 1417.7418 | 1386.5822 | 1402.9189 | 1415.2147 | 1390.7988 | 1399.333  | 1410.6938 |
| 1423.3013 | 1429.5204 | 1464.0088 | 1421.5845 | 1427.0196 | 1464.1834 | 1424.7395 | 1430.5031 | 1466.7257 |
| 1483.1583 | 1488.3436 | 1496.6853 | 1483.4123 | 1487.285  | 1492.1321 | 1486.5509 | 1493.7105 | 1498.9809 |
| 1500.0521 | 1507.8805 | 1511.0293 | 1503.3902 | 1506.1795 | 1510.9597 | 1501.257  | 1507.217  | 1510.0931 |
| 1518.4311 | 1525.861  | 1785.501  | 1513.9709 | 1519.4435 | 1785.5924 | 1512.4218 | 1517.7006 | 1787.9628 |
| 2913.1843 | 2937.0813 | 3016.4419 | 2992.086  | 3017.4866 | 3035.5007 | 2938.6524 | 2944.2852 | 3015.385  |
| 3036.18   | 3038.5918 | 3047.3559 | 3042.0365 | 3042.9284 | 3049.3399 | 3041.3548 | 3044.4428 | 3045.7342 |
| 3047.8856 | 3051.8251 | 3055.1753 | 3050.8173 | 3052.8376 | 3053.5602 | 3047.0491 | 3049.9971 | 3051.7371 |
| 3056.4047 | 3057.1063 | 3058.755  | 3056.896  | 3057.3025 | 3063.0946 | 3055.8915 | 3058.0604 | 3061.6366 |
| 3061.1454 | 3063.8194 | 3064.9919 | 3065.3476 | 3070.7838 | 3071.8495 | 3062.6445 | 3062.9669 | 3066.2827 |
| 3069.6587 | 3088.7091 | 3091.6668 | 3084.9212 | 3087.4625 | 3091.5461 | 3069.4904 | 3086.4202 | 3087.7982 |

|           |           |           |           |           |           |           |           |           |
|-----------|-----------|-----------|-----------|-----------|-----------|-----------|-----------|-----------|
| 3097.0223 | 3098.3062 | 3101.2636 | 3095.6041 | 3096.8153 | 3105.9612 | 3099.0413 | 3100.855  | 3107.8379 |
| 3105.3181 | 3106.4466 | 3821.965  | 3108.5487 | 3120.0934 | 3822.1907 | 3109.5551 | 3111.8008 | 3825.137  |
| <b>1d</b> |           |           | <b>1e</b> |           |           | <b>1f</b> |           |           |
| 50.9119   | 101.5257  | 120.6019  | 51.7741   | 96.8384   | 112.6101  | 60.9602   | 83.9672   | 123.0519  |
| 142.8992  | 172.1104  | 206.8943  | 142.3717  | 164.905   | 197.1088  | 147.9686  | 177.1155  | 195.5582  |
| 221.4385  | 243.7557  | 255.7829  | 211.5416  | 228.7665  | 252.3441  | 224.3339  | 238.3936  | 251.7206  |
| 262.9039  | 267.2755  | 287.8471  | 258.1254  | 262.9207  | 297.3616  | 253.9818  | 263.104   | 296.7614  |
| 315.6028  | 331.4382  | 350.9904  | 317.5052  | 330.1993  | 346.1448  | 309.6763  | 320.1287  | 347.6021  |
| 363.8218  | 382.7383  | 427.3444  | 383.9983  | 391.5046  | 447.7066  | 362.3341  | 389.6557  | 421.1459  |
| 452.7309  | 466.6234  | 476.8548  | 458.8411  | 470.374   | 485.6521  | 446.4179  | 465.3802  | 483.2696  |
| 489.7728  | 526.8221  | 531.3155  | 492.408   | 525.4668  | 547.1947  | 495.6342  | 509.1725  | 541.2596  |
| 552.5417  | 582.3827  | 593.1423  | 550.1825  | 578.7635  | 594.4288  | 550.399   | 560.3268  | 606.1185  |
| 630.5053  | 649.1154  | 670.0698  | 627.101   | 646.383   | 677.7707  | 625.3367  | 649.4711  | 669.3788  |
| 712.1819  | 741.3716  | 768.8349  | 708.0823  | 740.9789  | 764.4381  | 699.3171  | 749.8079  | 782.3922  |
| 785.0223  | 807.9682  | 828.7735  | 785.8841  | 806.9186  | 815.4042  | 787.8485  | 815.1605  | 827.0798  |
| 844.2686  | 860.529   | 874.1612  | 842.1296  | 860.4033  | 881.7331  | 846.8687  | 864.5646  | 870.4057  |



|           |           |           |           |           |           |           |           |           |
|-----------|-----------|-----------|-----------|-----------|-----------|-----------|-----------|-----------|
| 890.2227  | 895.5988  | 917.9136  | 889.0226  | 895.4184  | 913.0976  | 889.9111  | 915.1461  | 923.8989  |
| 934.8553  | 954.9979  | 961.1577  | 937.6103  | 938.7511  | 956.2179  | 932.3216  | 954.1034  | 965.465   |
| 971.2364  | 982.9935  | 993.951   | 962.9005  | 982.1641  | 994.1893  | 971.4335  | 979.9912  | 996.6776  |
| 1008.8559 | 1024.6076 | 1037.755  | 1004.8543 | 1021.1762 | 1035.89   | 1010.5176 | 1028.5181 | 1037.538  |
| 1039.7413 | 1057.4885 | 1058.7516 | 1039.2508 | 1052.3272 | 1057.1399 | 1041.7066 | 1054.2918 | 1066.3334 |
| 1076.1541 | 1082.8878 | 1094.6721 | 1063.2165 | 1073.4423 | 1083.1759 | 1069.6773 | 1082.7259 | 1095.415  |
| 1101.5729 | 1120.052  | 1127.4501 | 1102.343  | 1117.4625 | 1123.5625 | 1105.5141 | 1115.6587 | 1120.3449 |
| 1136.8408 | 1148.4151 | 1156.7409 | 1136.1424 | 1146.4868 | 1150.6732 | 1128.1435 | 1139.0001 | 1147.4412 |
| 1172.3272 | 1176.8227 | 1185.8182 | 1159.0309 | 1173.0227 | 1183.8992 | 1166.4184 | 1167.2223 | 1182.3302 |
| 1195.2226 | 1200.2234 | 1214.4904 | 1193.6917 | 1196.3699 | 1213.0856 | 1187.9762 | 1194.0772 | 1208.7046 |
| 1218.6458 | 1230.7509 | 1244.6933 | 1218.9778 | 1229.8954 | 1242.5192 | 1212.7518 | 1225.0271 | 1235.8373 |
| 1253.5171 | 1266.0137 | 1274.3982 | 1251.6395 | 1265.9745 | 1272.8307 | 1242.7979 | 1251.0378 | 1272.723  |
| 1276.9337 | 1287.5867 | 1291.8743 | 1277.0018 | 1287.259  | 1291.4382 | 1278.0831 | 1281.0108 | 1291.946  |
| 1313.5463 | 1317.7011 | 1327.13   | 1312.3791 | 1320.8701 | 1328.2281 | 1307.7572 | 1310.6164 | 1323.0926 |
| 1333.2907 | 1337.6381 | 1345.7884 | 1333.6325 | 1336.2944 | 1343.3888 | 1325.4842 | 1328.2852 | 1333.0486 |

|           |           |           |           |           |           |           |           |           |
|-----------|-----------|-----------|-----------|-----------|-----------|-----------|-----------|-----------|
| 1348.1376 | 1350.9088 | 1363.5257 | 1347.7358 | 1351.0689 | 1362.0457 | 1339.9405 | 1343.9463 | 1353.6833 |
| 1369.016  | 1374.9509 | 1380.2584 | 1371.5757 | 1375.8156 | 1376.9271 | 1357.8885 | 1366.6147 | 1373.3579 |
| 1383.1743 | 1405.7969 | 1417.7487 | 1387.0036 | 1403.1016 | 1415.4698 | 1391.0915 | 1399.8964 | 1411.1402 |
| 1424.6267 | 1438.0808 | 1464.0657 | 1424.7642 | 1433.7285 | 1464.3357 | 1425.4443 | 1439.6161 | 1466.8306 |
| 1483.25   | 1488.3609 | 1496.7546 | 1483.5628 | 1487.1643 | 1492.3701 | 1486.4572 | 1493.6471 | 1499.0961 |
| 1500.9533 | 1509.6624 | 1517.1805 | 1502.9862 | 1506.9727 | 1513.7074 | 1501.3533 | 1507.3719 | 1513.369  |
| 1518.8843 | 1526.0021 | 1791.4361 | 1519.4223 | 1520.568  | 1791.3944 | 1518.1026 | 1518.3685 | 1793.6383 |
| 2913.7899 | 2937.2386 | 3015.5467 | 2992.5398 | 3016.3232 | 3034.1557 | 2939.4932 | 2945.1235 | 3014.193  |
| 3031.2528 | 3038.1686 | 3046.8987 | 3042.0552 | 3043.2942 | 3048.8027 | 3034.8672 | 3040.8846 | 3045.5981 |
| 3048.294  | 3052.8786 | 3056.6163 | 3051.0818 | 3053.6747 | 3054.2041 | 3047.9983 | 3049.597  | 3051.8798 |
| 3057.2686 | 3058.3309 | 3061.0052 | 3057.4236 | 3062.2344 | 3064.1103 | 3056.675  | 3059.0228 | 3063.332  |
| 3061.48   | 3064.6324 | 3070.2657 | 3071.1503 | 3072.1907 | 3082.617  | 3064.1686 | 3065.3152 | 3066.7999 |
| 3083.2176 | 3084.643  | 3084.643  | 3084.3822 | 3085.7086 | 3094.5421 | 3083.5599 | 3088.374  | 3094.0963 |
| 3097.4787 | 3098.4969 | 3102.0781 | 3096.3235 | 3096.7033 | 3105.1715 | 3097.1243 | 3101.9535 | 3108.3151 |
| 3105.4164 | 3106.6764 | 3813.9795 | 3108.8192 | 3120.8909 | 3811.1385 | 3110.751  | 3111.9921 | 3814.0607 |

**Table S4.** Frequencies of lycopalhine A (**1**) at the B3LYP/6-31+G(d,p) level of theory (PCM model) in methanol (cm<sup>-1</sup>)

| <b>1a</b> |          |          | <b>1b</b> |          |          | <b>1c</b> |          |          |
|-----------|----------|----------|-----------|----------|----------|-----------|----------|----------|
| 49.7061   | 100.8710 | 118.6045 | 55.5385   | 100.5125 | 112.8665 | 59.7552   | 85.1208  | 123.5317 |
| 142.3682  | 171.5259 | 206.6186 | 143.6161  | 165.0003 | 207.7756 | 149.0304  | 178.2845 | 194.0047 |
| 222.6192  | 245.6595 | 253.3811 | 214.6641  | 234.7734 | 252.3097 | 225.2606  | 242.3147 | 253.8842 |
| 263.0531  | 283.2370 | 296.2774 | 255.8066  | 286.5738 | 300.4661 | 259.8545  | 292.4582 | 298.1314 |
| 311.1340  | 323.5513 | 351.5816 | 308.9970  | 329.7799 | 342.9111 | 300.6867  | 317.6778 | 345.9431 |
| 362.2594  | 381.1983 | 425.3165 | 376.8473  | 389.5038 | 447.3188 | 361.4332  | 385.9774 | 420.6736 |
| 451.6451  | 467.8060 | 479.0656 | 457.1977  | 469.8156 | 486.3777 | 445.2969  | 465.7263 | 483.5271 |
| 492.3370  | 527.6796 | 532.7054 | 492.8625  | 526.6674 | 548.4906 | 496.5479  | 510.9922 | 541.3371 |
| 552.6517  | 581.7951 | 593.4879 | 550.5324  | 578.6917 | 595.2850 | 551.8025  | 560.2022 | 607.1066 |
| 631.2472  | 650.7406 | 670.3141 | 628.8848  | 649.2880 | 677.8837 | 628.6958  | 650.7544 | 668.8007 |
| 714.2261  | 742.5217 | 768.1349 | 709.5539  | 741.8586 | 763.2183 | 700.5004  | 753.2620 | 781.2918 |
| 789.0939  | 808.2663 | 826.5640 | 790.3076  | 806.5958 | 813.7755 | 791.8185  | 815.6357 | 825.7061 |
| 849.1611  | 861.6691 | 876.4331 | 848.6569  | 860.2521 | 884.1723 | 853.8724  | 865.2713 | 871.4607 |

|           |           |           |           |           |           |           |           |           |
|-----------|-----------|-----------|-----------|-----------|-----------|-----------|-----------|-----------|
| 892.1882  | 895.7483  | 918.2844  | 888.0782  | 897.6567  | 913.1782  | 895.5187  | 915.5371  | 923.2827  |
| 937.9106  | 955.7712  | 960.6285  | 939.5772  | 940.5165  | 955.7039  | 935.4862  | 954.1457  | 964.1925  |
| 968.7350  | 987.0829  | 993.2720  | 962.9060  | 986.1852  | 993.3165  | 973.3836  | 984.0578  | 997.8357  |
| 1010.2828 | 1021.6986 | 1025.5853 | 1006.6228 | 1014.7853 | 1024.6558 | 1010.1817 | 1021.7134 | 1029.2376 |
| 1036.5321 | 1054.4158 | 1057.3745 | 1039.0569 | 1047.3011 | 1055.0841 | 1037.5723 | 1051.4562 | 1064.6991 |
| 1072.3459 | 1078.8146 | 1094.4025 | 1062.4562 | 1069.0248 | 1082.4968 | 1067.5100 | 1079.9958 | 1094.6273 |
| 1105.1485 | 1114.4973 | 1124.6809 | 1102.9625 | 1116.2386 | 1120.3746 | 1107.6563 | 1110.9910 | 1119.5328 |
| 1135.7422 | 1146.7539 | 1155.0147 | 1135.6019 | 1144.0693 | 1149.6557 | 1126.0082 | 1139.7851 | 1146.4408 |
| 1168.9309 | 1171.5344 | 1190.2142 | 1158.6279 | 1169.9269 | 1187.3454 | 1164.3549 | 1168.0887 | 1178.2623 |
| 1194.6487 | 1195.3856 | 1211.7210 | 1191.6633 | 1195.4114 | 1212.1418 | 1186.0154 | 1190.8469 | 1205.8094 |
| 1217.5720 | 1233.0245 | 1240.3089 | 1218.1753 | 1231.0981 | 1239.4521 | 1212.4296 | 1224.9973 | 1238.8185 |
| 1253.6477 | 1261.5824 | 1266.4445 | 1251.8488 | 1257.8251 | 1266.0676 | 1240.0931 | 1248.2536 | 1258.3671 |
| 1279.5054 | 1284.7572 | 1303.3012 | 1278.6147 | 1285.3794 | 1304.5154 | 1279.9999 | 1282.2773 | 1301.9016 |
| 1310.1143 | 1322.2150 | 1326.5755 | 1317.0166 | 1322.6585 | 1326.3252 | 1304.6541 | 1317.8349 | 1325.3755 |
| 1334.6313 | 1342.6116 | 1344.3902 | 1334.4061 | 1341.9869 | 1343.7399 | 1326.7661 | 1329.6082 | 1337.4484 |

|           |           |           |           |           |           |           |           |           |
|-----------|-----------|-----------|-----------|-----------|-----------|-----------|-----------|-----------|
| 1349.6235 | 1351.5262 | 1364.9330 | 1349.8334 | 1350.9070 | 1363.8383 | 1340.6315 | 1346.0803 | 1354.2760 |
| 1367.2288 | 1374.8571 | 1380.5569 | 1371.2370 | 1376.0409 | 1377.3531 | 1360.6111 | 1367.5995 | 1374.4792 |
| 1382.4613 | 1403.2593 | 1415.3227 | 1387.5323 | 1402.5277 | 1413.1631 | 1388.6339 | 1396.3749 | 1410.3916 |
| 1422.4401 | 1428.9827 | 1459.9636 | 1421.8683 | 1427.9954 | 1460.5327 | 1424.9058 | 1428.7006 | 1462.2968 |
| 1476.1253 | 1482.5958 | 1490.2042 | 1477.1818 | 1482.6610 | 1485.5929 | 1481.6732 | 1485.8070 | 1492.7278 |
| 1495.0750 | 1502.0669 | 1504.8980 | 1498.7094 | 1500.4272 | 1504.9334 | 1497.0290 | 1498.1001 | 1504.9950 |
| 1510.1691 | 1521.4567 | 1750.7814 | 1509.5211 | 1511.5749 | 1750.2818 | 1505.8306 | 1509.2412 | 1753.8687 |
| 2939.1806 | 2953.9042 | 3023.2509 | 2991.5893 | 3023.8066 | 3042.5283 | 2938.6668 | 2942.2151 | 3022.3651 |
| 3044.7888 | 3045.1766 | 3045.6417 | 3044.0389 | 3051.2917 | 3052.9086 | 3045.4989 | 3048.9390 | 3049.9311 |
| 3053.2469 | 3057.1215 | 3058.4750 | 3056.1295 | 3056.5105 | 3059.0733 | 3051.8262 | 3053.8205 | 3054.7359 |
| 3060.0868 | 3063.8900 | 3064.7932 | 3059.2307 | 3063.9787 | 3064.4187 | 3059.1363 | 3061.0793 | 3062.8295 |
| 3065.5940 | 3067.1081 | 3071.8592 | 3069.4790 | 3071.5801 | 3073.0306 | 3064.3436 | 3067.4172 | 3069.6261 |
| 3072.9155 | 3086.0607 | 3094.2459 | 3084.9443 | 3086.4857 | 3093.8751 | 3076.6540 | 3085.5630 | 3091.4622 |
| 3096.3483 | 3097.0970 | 3103.9360 | 3096.3806 | 3098.7469 | 3103.7532 | 3097.4421 | 3099.1894 | 3106.7473 |
| 3105.0174 | 3110.0392 | 3810.4605 | 3110.1390 | 3119.7426 | 3808.8981 | 3110.3311 | 3112.2028 | 3815.9223 |

| <b>1d</b> |          |          | <b>1e</b> |          |          | <b>1f</b> |          |          |
|-----------|----------|----------|-----------|----------|----------|-----------|----------|----------|
| 48.1554   | 100.5549 | 118.4369 | 55.5365   | 100.8613 | 113.0934 | 57.1490   | 83.7234  | 122.9048 |
| 142.0037  | 170.4364 | 206.3271 | 143.6586  | 165.7102 | 208.1333 | 148.7120  | 177.3238 | 193.9951 |
| 221.7146  | 245.9734 | 255.7986 | 213.9810  | 233.0038 | 252.2050 | 225.2641  | 241.9534 | 255.1546 |
| 263.0921  | 280.4205 | 288.2021 | 263.0560  | 280.9760 | 302.6433 | 256.9180  | 271.3673 | 298.4264 |
| 315.4859  | 332.8350 | 353.2954 | 323.1301  | 330.7684 | 348.8385 | 310.5649  | 319.1748 | 348.8089 |
| 364.2921  | 384.1614 | 426.7793 | 384.0275  | 390.1505 | 447.7373 | 363.8845  | 392.2664 | 421.3743 |
| 452.1483  | 467.8624 | 478.9192 | 457.5125  | 470.3443 | 485.6220 | 446.0281  | 465.7869 | 483.2759 |
| 490.8808  | 526.8085 | 531.9662 | 492.9061  | 525.7922 | 548.2337 | 496.1380  | 509.8760 | 540.0664 |
| 552.9485  | 582.5328 | 593.5067 | 550.2940  | 579.7550 | 595.1031 | 553.2810  | 559.8151 | 606.8849 |
| 631.3175  | 649.6470 | 669.9385 | 628.8785  | 648.7285 | 678.0139 | 629.5769  | 648.3480 | 668.1640 |
| 713.7111  | 740.9427 | 767.8296 | 709.1031  | 740.4781 | 762.5704 | 700.2964  | 750.7112 | 780.8279 |
| 784.9272  | 806.7273 | 826.6542 | 786.4516  | 805.7418 | 813.0427 | 787.5124  | 814.7381 | 825.5813 |
| 844.3159  | 860.0532 | 875.0618 | 842.1067  | 860.2420 | 882.0125 | 847.0151  | 864.6358 | 870.8130 |
| 891.8577  | 893.1958 | 917.6212 | 888.1360  | 895.2433 | 912.8811 | 892.3650  | 915.6292 | 922.6330 |
| 936.6288  | 954.3214 | 960.6938 | 938.6583  | 939.4493 | 955.5380 | 933.6931  | 953.1398 | 964.1023 |

|           |           |           |           |           |           |           |           |           |
|-----------|-----------|-----------|-----------|-----------|-----------|-----------|-----------|-----------|
| 969.1736  | 982.9465  | 993.4802  | 962.7117  | 982.2963  | 994.6107  | 971.5745  | 979.4492  | 997.4093  |
| 1008.2139 | 1024.3508 | 1032.1523 | 1004.8692 | 1017.8709 | 1029.4515 | 1009.6935 | 1025.3288 | 1032.0087 |
| 1035.9378 | 1050.9865 | 1055.8548 | 1038.6281 | 1049.0977 | 1051.6461 | 1039.3279 | 1050.9072 | 1062.0990 |
| 1071.2333 | 1080.4819 | 1090.8391 | 1061.6623 | 1070.5454 | 1079.4877 | 1064.4221 | 1081.5793 | 1091.7273 |
| 1101.6700 | 1115.0930 | 1125.2243 | 1100.0281 | 1116.3772 | 1121.2922 | 1105.0326 | 1110.9912 | 1118.9021 |
| 1134.7527 | 1147.8462 | 1154.7935 | 1134.3497 | 1145.0558 | 1148.8448 | 1125.7527 | 1139.5448 | 1145.6726 |
| 1169.1476 | 1175.0466 | 1187.4507 | 1158.5354 | 1175.3562 | 1187.3863 | 1165.3916 | 1168.0657 | 1181.3665 |
| 1194.3624 | 1197.1706 | 1214.2030 | 1192.7412 | 1195.5112 | 1214.4483 | 1187.6242 | 1191.5371 | 1208.2340 |
| 1216.2619 | 1231.2779 | 1243.8623 | 1217.1104 | 1231.5697 | 1241.6771 | 1211.3258 | 1225.0748 | 1236.0744 |
| 1254.5988 | 1262.4154 | 1273.3127 | 1251.5826 | 1262.2137 | 1273.4472 | 1242.4817 | 1250.5522 | 1272.3722 |
| 1279.5854 | 1287.7236 | 1293.6514 | 1279.8546 | 1288.6359 | 1294.7086 | 1279.4253 | 1283.2550 | 1292.7061 |
| 1309.6692 | 1315.6670 | 1326.6093 | 1313.0923 | 1319.5214 | 1327.3215 | 1304.2907 | 1310.2238 | 1323.5961 |
| 1331.8288 | 1338.0655 | 1346.3374 | 1333.4926 | 1337.9612 | 1344.4205 | 1326.3749 | 1330.4125 | 1332.3521 |
| 1349.5497 | 1351.4839 | 1363.8443 | 1348.6605 | 1351.9398 | 1362.5144 | 1339.7585 | 1344.5559 | 1353.1080 |
| 1367.8311 | 1375.1937 | 1380.5557 | 1372.1859 | 1376.1304 | 1377.4866 | 1358.8116 | 1367.5875 | 1374.5467 |

|           |           |           |           |           |           |           |           |           |
|-----------|-----------|-----------|-----------|-----------|-----------|-----------|-----------|-----------|
| 1382.5325 | 1403.6416 | 1415.3037 | 1387.6048 | 1402.7561 | 1413.1113 | 1388.7147 | 1396.5835 | 1410.9270 |
| 1423.9826 | 1438.9937 | 1459.9961 | 1426.5644 | 1432.9525 | 1460.6239 | 1426.8561 | 1438.6341 | 1462.5425 |
| 1476.1784 | 1482.6226 | 1490.3706 | 1477.2251 | 1482.6146 | 1485.6233 | 1481.6797 | 1485.8664 | 1493.0464 |
| 1496.1976 | 1504.0112 | 1510.1404 | 1499.2244 | 1501.3698 | 1509.4603 | 1497.7995 | 1498.3297 | 1505.6805 |
| 1515.6202 | 1521.4466 | 1751.7200 | 1511.5885 | 1518.4890 | 1751.0736 | 1509.2640 | 1522.2490 | 1754.9393 |
| 2939.4442 | 2954.2625 | 3023.6736 | 2991.7687 | 3024.0586 | 3042.8086 | 2938.5552 | 2942.1332 | 3022.7654 |
| 3042.8787 | 3045.1509 | 3045.9571 | 3044.5374 | 3051.3751 | 3053.0133 | 3045.9957 | 3047.1820 | 3049.5323 |
| 3052.9984 | 3057.5458 | 3059.4180 | 3056.5486 | 3057.2019 | 3059.4634 | 3050.4053 | 3054.1288 | 3055.1752 |
| 3064.1140 | 3065.0963 | 3065.8354 | 3063.6003 | 3064.9378 | 3069.8092 | 3059.4330 | 3061.5406 | 3063.6242 |
| 3067.1868 | 3072.4978 | 3073.6508 | 3071.7881 | 3074.7559 | 3082.8245 | 3067.1318 | 3068.6849 | 3078.0480 |
| 3083.3727 | 3092.9822 | 3095.7680 | 3086.7815 | 3092.0594 | 3094.6358 | 3084.3344 | 3094.2460 | 3095.5291 |
| 3096.8216 | 3099.0356 | 3100.3892 | 3098.0450 | 3098.9727 | 3099.3953 | 3098.4327 | 3099.6951 | 3104.2144 |
| 3104.2739 | 3110.0983 | 3797.8176 | 3110.2657 | 3119.9517 | 3799.6688 | 3107.0327 | 3112.4008 | 3802.8049 |



**Table S5.** Frequencies of lycopalhine A (**1**) at the B3LYP/6-31+G(d,p) level of theory (PCM model) in pyridine (cm<sup>-1</sup>)

| <b>1a</b> |          |          | <b>1b</b> |          |          | <b>1c</b> |          |          |
|-----------|----------|----------|-----------|----------|----------|-----------|----------|----------|
| 49.1702   | 100.2543 | 118.2652 | 55.5543   | 100.5155 | 113.3700 | 60.2170   | 85.6224  | 123.5293 |
| 142.2452  | 171.1631 | 206.3746 | 143.7252  | 165.4286 | 208.1078 | 149.1667  | 178.9097 | 193.9989 |
| 222.5983  | 245.7265 | 253.6090 | 215.2384  | 234.9800 | 252.6178 | 225.1538  | 241.7302 | 253.8361 |
| 262.7364  | 283.9480 | 297.5732 | 256.1339  | 287.8682 | 301.3201 | 259.7745  | 293.2360 | 298.4112 |
| 311.1932  | 323.4516 | 350.8958 | 309.1846  | 329.8339 | 342.9919 | 302.6704  | 317.7580 | 345.9662 |
| 361.9858  | 381.2412 | 425.2071 | 376.7671  | 389.5319 | 447.3414 | 361.3058  | 385.7893 | 420.6551 |
| 451.7446  | 467.5130 | 478.5768 | 457.3174  | 469.9030 | 486.5381 | 445.3057  | 465.7089 | 483.5732 |
| 492.1965  | 527.6115 | 532.4729 | 492.8907  | 526.7314 | 548.6039 | 496.6126  | 510.9412 | 541.4340 |
| 552.7421  | 581.7384 | 593.4397 | 550.5330  | 578.6852 | 595.3298 | 551.8943  | 560.2440 | 607.1104 |
| 631.2954  | 650.8108 | 670.2589 | 628.8636  | 649.2412 | 677.8592 | 628.6742  | 650.8408 | 668.8301 |
| 713.7392  | 742.4751 | 768.0463 | 709.3872  | 741.8669 | 763.2881 | 700.3534  | 753.1504 | 781.5403 |
| 789.0029  | 808.2569 | 826.5128 | 790.2545  | 806.6649 | 814.0164 | 791.8159  | 815.7174 | 825.9518 |
| 849.0928  | 861.6973 | 875.9822 | 848.7358  | 860.4922 | 884.1804 | 853.9395  | 865.4542 | 871.3844 |

|           |           |           |           |           |           |           |           |           |
|-----------|-----------|-----------|-----------|-----------|-----------|-----------|-----------|-----------|
| 892.2006  | 895.8323  | 918.4388  | 888.2402  | 897.7466  | 913.2249  | 895.5950  | 915.6304  | 923.5057  |
| 937.8373  | 955.6910  | 960.6076  | 939.6291  | 940.5035  | 955.6697  | 935.4086  | 954.1832  | 964.3711  |
| 968.8574  | 987.1632  | 993.3511  | 963.0989  | 986.2650  | 993.3491  | 973.3841  | 984.1228  | 997.8722  |
| 1010.4338 | 1022.1550 | 1025.4687 | 1006.8641 | 1015.1905 | 1025.2248 | 1010.2717 | 1021.9877 | 1029.7564 |
| 1036.9376 | 1054.7001 | 1057.7215 | 1039.1736 | 1047.6344 | 1055.4254 | 1037.6674 | 1051.7414 | 1065.1760 |
| 1072.6696 | 1079.0367 | 1094.5101 | 1062.7174 | 1069.2921 | 1082.8653 | 1067.8303 | 1080.2209 | 1094.8194 |
| 1105.3140 | 1115.0391 | 1124.5488 | 1103.2623 | 1116.3577 | 1120.6259 | 1107.8653 | 1111.4027 | 1119.7751 |
| 1136.1231 | 1147.0037 | 1155.0661 | 1135.9029 | 1144.4149 | 1149.8620 | 1126.3629 | 1139.9995 | 1146.8340 |
| 1169.2249 | 1171.8719 | 1190.3993 | 1159.1930 | 1170.0717 | 1187.5567 | 1164.6445 | 1168.2239 | 1178.4809 |
| 1194.7033 | 1195.7191 | 1211.8741 | 1191.7488 | 1195.4836 | 1212.3752 | 1186.3301 | 1191.0637 | 1205.9899 |
| 1217.9376 | 1233.0359 | 1240.3143 | 1218.4486 | 1231.2676 | 1239.5190 | 1212.6825 | 1225.1665 | 1238.9344 |
| 1253.3382 | 1261.7856 | 1266.4459 | 1251.8677 | 1258.1329 | 1266.4065 | 1240.2819 | 1248.2299 | 1258.6161 |
| 1279.2658 | 1284.6542 | 1303.3473 | 1278.3706 | 1285.3986 | 1304.4990 | 1280.0903 | 1282.3022 | 1301.8953 |
| 1310.6746 | 1322.2929 | 1326.7783 | 1317.1578 | 1322.7813 | 1326.5440 | 1305.1665 | 1317.7264 | 1325.1550 |
| 1334.6405 | 1342.5684 | 1344.2463 | 1334.5120 | 1341.8465 | 1343.7435 | 1326.8638 | 1329.5849 | 1337.4488 |

|           |           |           |           |           |           |           |           |           |
|-----------|-----------|-----------|-----------|-----------|-----------|-----------|-----------|-----------|
| 1349.4748 | 1351.3259 | 1364.7886 | 1349.7024 | 1350.7862 | 1363.7378 | 1340.6789 | 1345.9829 | 1354.3003 |
| 1367.2061 | 1374.8374 | 1380.5520 | 1371.2212 | 1376.1767 | 1377.3238 | 1360.4662 | 1367.5403 | 1374.3962 |
| 1382.0125 | 1403.3216 | 1415.5380 | 1387.4585 | 1402.4560 | 1413.3133 | 1388.8070 | 1396.5185 | 1410.5265 |
| 1422.6014 | 1429.1901 | 1460.2097 | 1421.9122 | 1427.8912 | 1461.1208 | 1425.1421 | 1429.0660 | 1462.9194 |
| 1476.6789 | 1482.9814 | 1490.6107 | 1477.9042 | 1483.1429 | 1486.3888 | 1482.1432 | 1486.5029 | 1493.4468 |
| 1495.6111 | 1502.4774 | 1505.3041 | 1498.9476 | 1500.8888 | 1505.4969 | 1497.2061 | 1498.8521 | 1505.3967 |
| 1510.7679 | 1521.4339 | 1753.5204 | 1509.8152 | 1512.6861 | 1753.0843 | 1506.2841 | 1510.0921 | 1756.5205 |
| 2935.6357 | 2951.6773 | 3022.4006 | 2991.8387 | 3023.2993 | 3042.6896 | 2938.7745 | 2942.6135 | 3021.6047 |
| 3044.5174 | 3044.8152 | 3046.0295 | 3043.4105 | 3050.7803 | 3052.8791 | 3045.7931 | 3048.6786 | 3049.6210 |
| 3053.7250 | 3056.1747 | 3058.0955 | 3055.7074 | 3056.1783 | 3058.4493 | 3051.8215 | 3052.7160 | 3054.6950 |
| 3059.8164 | 3063.2820 | 3064.4753 | 3059.1691 | 3063.3327 | 3064.2013 | 3059.5722 | 3060.5899 | 3062.4181 |
| 3065.1772 | 3066.6259 | 3071.2190 | 3069.7604 | 3071.5645 | 3072.3305 | 3064.0627 | 3067.1978 | 3068.9592 |
| 3072.4163 | 3086.6659 | 3094.2073 | 3085.3483 | 3086.5334 | 3093.8220 | 3075.7976 | 3085.6850 | 3091.1999 |
| 3096.9823 | 3097.4323 | 3103.2650 | 3096.3270 | 3098.4566 | 3103.8812 | 3097.5648 | 3099.4395 | 3106.9154 |
| 3104.8646 | 3109.8643 | 3811.4190 | 3110.0729 | 3119.8623 | 3809.7871 | 3110.5887 | 3111.7818 | 3816.8891 |

| <b>1d</b> |          |          | <b>1e</b> |          |          | <b>1f</b> |          |          |
|-----------|----------|----------|-----------|----------|----------|-----------|----------|----------|
| 48.3953   | 100.1442 | 118.3355 | 55.1272   | 100.7467 | 113.5961 | 57.8137   | 84.3785  | 123.0001 |
| 141.8629  | 170.8826 | 206.2457 | 143.7394  | 166.2486 | 208.4113 | 148.7598  | 178.0416 | 194.3201 |
| 221.8807  | 245.8890 | 255.8831 | 214.6290  | 233.3969 | 252.5106 | 225.1987  | 241.3146 | 255.1186 |
| 262.8631  | 285.3242 | 288.0979 | 262.2493  | 284.2666 | 303.5468 | 256.5675  | 270.5991 | 298.5152 |
| 315.6931  | 332.6977 | 352.7930 | 323.6658  | 330.9303 | 348.5608 | 310.3745  | 319.0929 | 348.7516 |
| 364.3259  | 384.6099 | 426.7035 | 384.1393  | 390.1838 | 447.7317 | 363.8291  | 392.3166 | 421.4231 |
| 452.2563  | 467.7166 | 478.4783 | 457.5670  | 470.4419 | 485.7407 | 446.0468  | 465.8570 | 483.3293 |
| 490.7305  | 526.7662 | 531.7194 | 492.8916  | 525.7718 | 548.3525 | 496.2208  | 509.7957 | 540.2333 |
| 552.9447  | 582.4769 | 593.4293 | 550.2118  | 579.7035 | 595.0522 | 553.2229  | 559.8019 | 606.8741 |
| 631.3081  | 649.8052 | 669.9322 | 628.7766  | 648.5279 | 677.9824 | 629.4686  | 648.6795 | 668.2233 |
| 713.2881  | 740.9407 | 767.7666 | 708.9523  | 740.4959 | 762.6633 | 700.2155  | 750.5821 | 781.0552 |
| 784.8703  | 806.7763 | 826.5415 | 786.3559  | 805.8442 | 813.2845 | 787.5012  | 814.8076 | 825.7993 |
| 844.2372  | 860.0271 | 874.6444 | 842.0964  | 860.3893 | 882.0137 | 847.0288  | 864.6356 | 870.7583 |
| 891.6990  | 893.3462 | 917.7037 | 888.2238  | 895.2893 | 912.8897 | 892.2284  | 915.6036 | 922.8352 |
| 936.4204  | 954.3482 | 960.5627 | 938.6105  | 939.3168 | 955.6021 | 933.6048  | 953.1656 | 964.2473 |

|           |           |           |           |           |           |           |           |           |
|-----------|-----------|-----------|-----------|-----------|-----------|-----------|-----------|-----------|
| 969.3067  | 982.9282  | 993.5779  | 962.7829  | 982.3096  | 994.6346  | 971.5034  | 979.5156  | 997.2917  |
| 1008.2204 | 1024.2530 | 1032.6105 | 1004.9735 | 1018.3216 | 1030.0852 | 1009.8201 | 1025.6475 | 1032.5718 |
| 1036.2877 | 1051.5615 | 1055.9530 | 1038.7650 | 1049.3954 | 1052.0293 | 1039.4320 | 1051.2001 | 1062.4532 |
| 1071.6870 | 1080.6659 | 1091.0073 | 1061.8811 | 1070.8160 | 1079.7631 | 1064.8532 | 1081.7900 | 1091.9690 |
| 1101.7449 | 1115.5826 | 1125.1196 | 1100.2757 | 1116.4853 | 1121.4873 | 1105.0957 | 1111.4339 | 1119.0775 |
| 1134.9764 | 1147.9034 | 1154.9214 | 1134.5630 | 1145.3819 | 1148.9608 | 1126.0285 | 1139.5649 | 1146.0333 |
| 1169.4885 | 1175.1185 | 1187.3787 | 1159.1366 | 1175.3672 | 1187.3022 | 1165.6031 | 1168.2106 | 1181.4916 |
| 1194.6869 | 1197.4017 | 1214.2153 | 1192.9455 | 1195.6521 | 1214.2512 | 1187.6482 | 1191.7387 | 1208.2944 |
| 1216.3400 | 1231.3468 | 1243.9728 | 1217.3915 | 1231.7729 | 1241.8099 | 1211.5003 | 1225.2106 | 1236.1172 |
| 1254.4062 | 1262.6526 | 1273.4636 | 1251.6715 | 1262.8410 | 1273.6050 | 1242.6694 | 1250.7121 | 1272.4767 |
| 1279.3435 | 1287.6745 | 1293.8183 | 1279.7174 | 1288.8259 | 1294.4923 | 1279.4779 | 1283.2527 | 1292.8083 |
| 1310.1122 | 1315.7266 | 1326.8199 | 1313.1025 | 1319.6801 | 1327.5682 | 1304.8171 | 1310.1921 | 1323.6408 |
| 1331.9572 | 1337.9068 | 1346.0613 | 1333.6283 | 1337.7601 | 1344.3189 | 1326.1374 | 1330.2841 | 1332.3603 |
| 1349.3892 | 1351.3295 | 1363.6352 | 1348.6244 | 1351.8119 | 1362.4409 | 1339.7833 | 1344.5310 | 1353.2041 |
| 1367.8009 | 1375.1137 | 1380.5671 | 1372.1937 | 1376.2975 | 1377.4601 | 1358.7210 | 1367.5494 | 1374.4843 |

|           |           |           |           |           |           |           |           |           |
|-----------|-----------|-----------|-----------|-----------|-----------|-----------|-----------|-----------|
| 1382.1231 | 1403.7041 | 1415.4943 | 1387.5620 | 1402.6551 | 1413.3112 | 1388.9280 | 1396.7426 | 1411.0866 |
| 1424.1429 | 1439.3743 | 1460.2264 | 1426.3269 | 1433.1056 | 1461.2136 | 1427.0493 | 1439.0479 | 1463.1428 |
| 1476.7084 | 1483.0103 | 1490.8026 | 1477.9686 | 1483.0753 | 1486.4484 | 1482.1566 | 1486.5552 | 1493.7668 |
| 1496.7040 | 1504.2195 | 1510.7150 | 1499.3027 | 1501.7534 | 1509.7656 | 1497.9666 | 1498.9901 | 1506.1981 |
| 1516.2114 | 1521.4716 | 1755.2935 | 1512.6973 | 1519.0103 | 1754.6363 | 1510.1529 | 1522.0355 | 1758.2898 |
| 2936.0736 | 2952.1169 | 3022.6306 | 2992.0860 | 3023.3675 | 3043.0946 | 2938.7804 | 2942.6665 | 3021.8255 |
| 3041.2999 | 3044.9119 | 3046.4003 | 3043.4734 | 3050.9977 | 3052.9118 | 3045.4381 | 3047.3151 | 3049.3150 |
| 3053.6123 | 3056.4050 | 3059.3916 | 3056.3387 | 3056.5820 | 3059.0416 | 3050.2801 | 3052.9248 | 3055.1258 |
| 3063.4507 | 3064.8072 | 3065.3996 | 3062.8767 | 3064.6880 | 3070.1250 | 3059.9853 | 3061.0260 | 3063.4033 |
| 3066.7345 | 3071.7462 | 3072.6717 | 3071.8796 | 3073.4886 | 3083.0089 | 3066.6469 | 3068.1203 | 3076.6417 |
| 3083.5433 | 3092.1147 | 3095.9450 | 3086.8899 | 3091.3746 | 3094.7342 | 3084.3254 | 3094.2867 | 3095.1064 |
| 3097.6387 | 3099.3939 | 3101.4390 | 3098.5536 | 3098.7327 | 3100.2122 | 3098.2749 | 3099.9747 | 3105.3093 |
| 3103.6652 | 3109.9540 | 3799.2577 | 3110.1876 | 3120.1543 | 3800.8197 | 3107.2867 | 3111.9613 | 3804.1314 |
